# Supplementary material
Source: PubMed Central journal article supplement (PMC6109616)

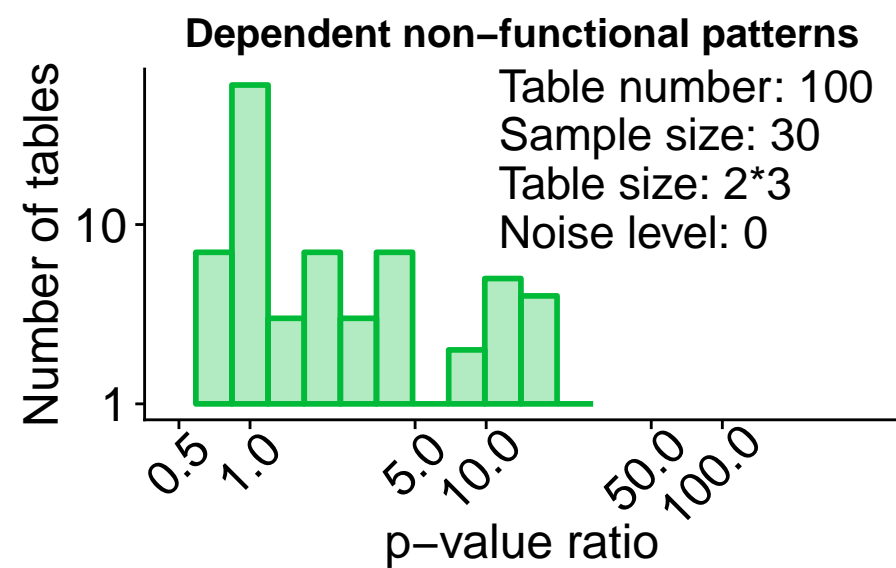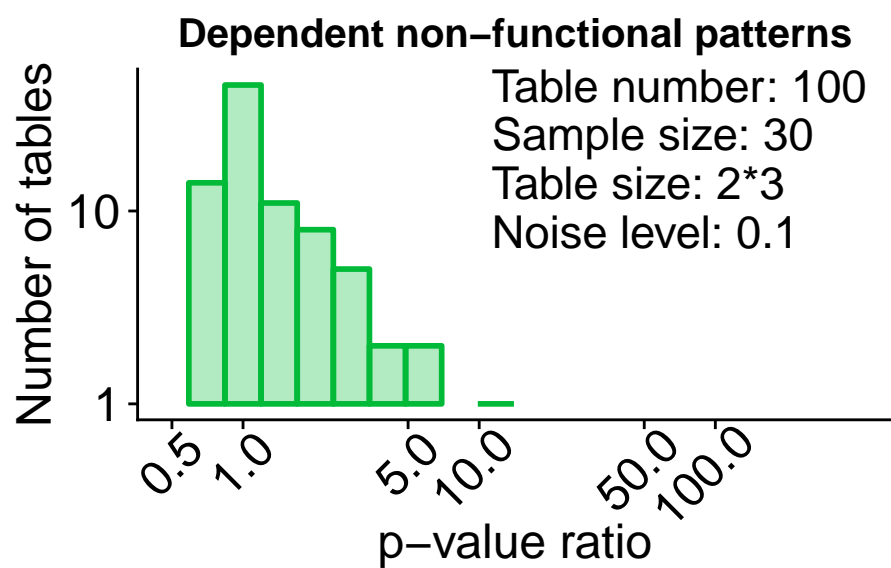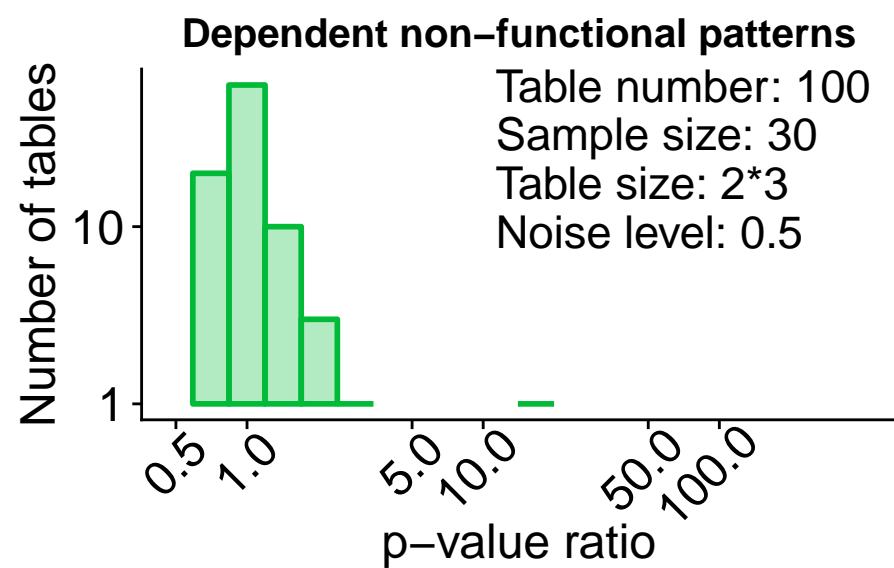

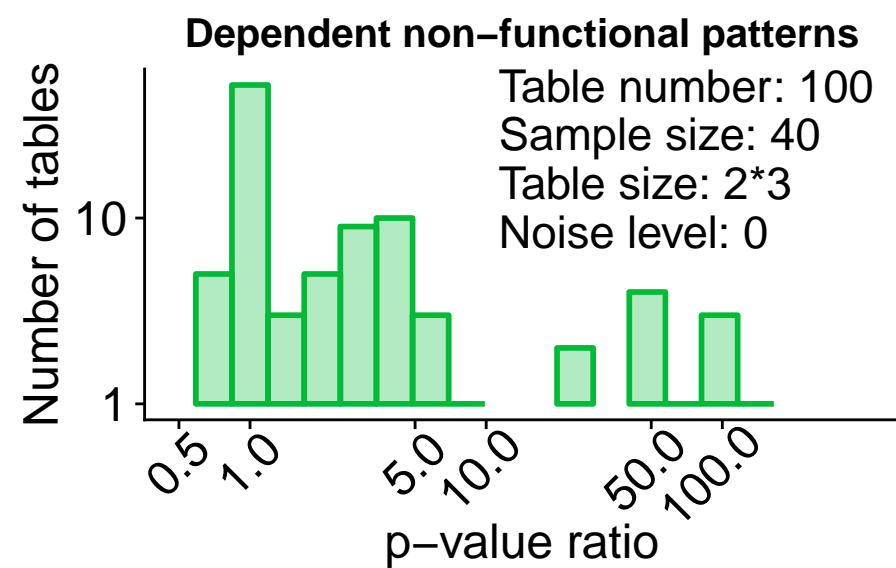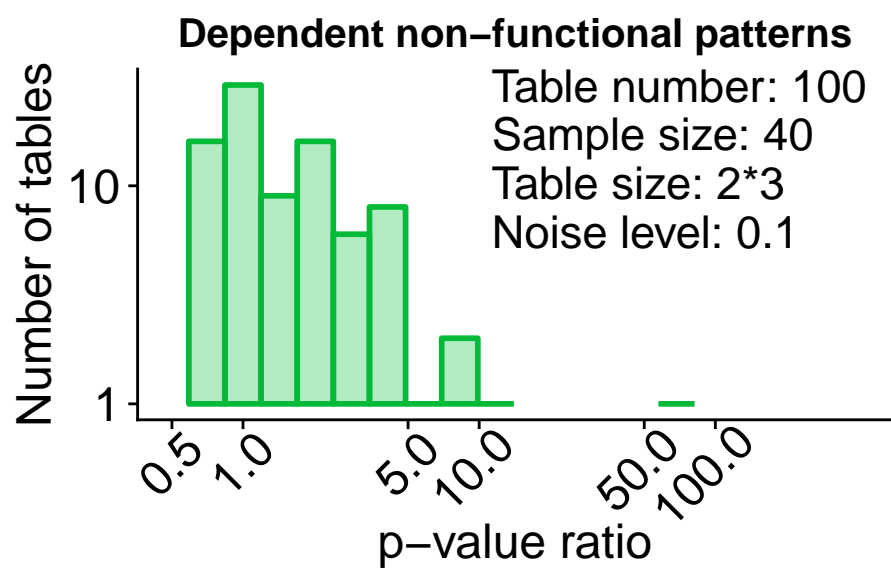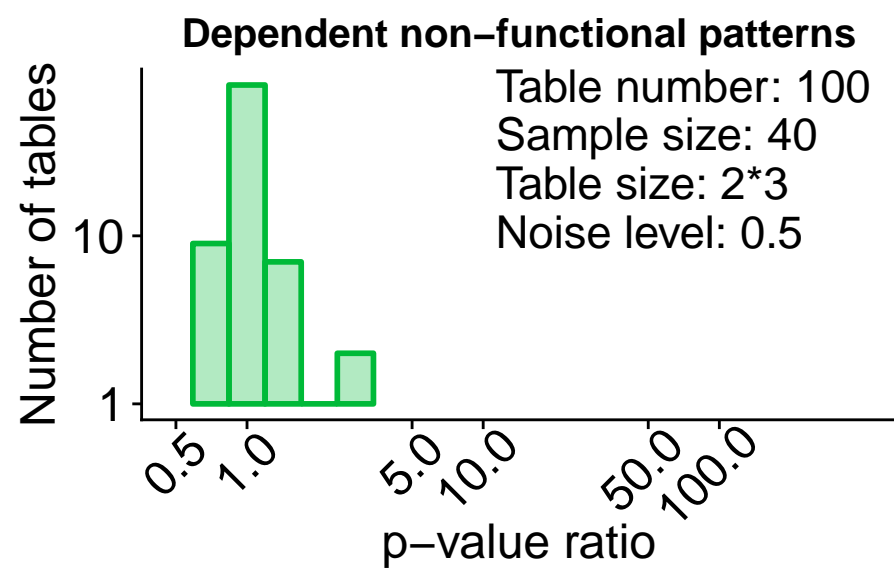

**Dependent non-functional patterns**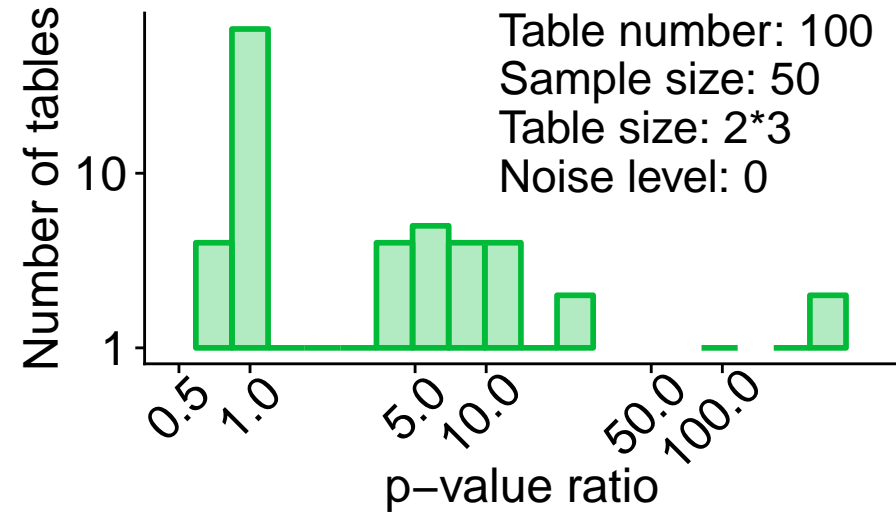**Dependent non-functional patterns**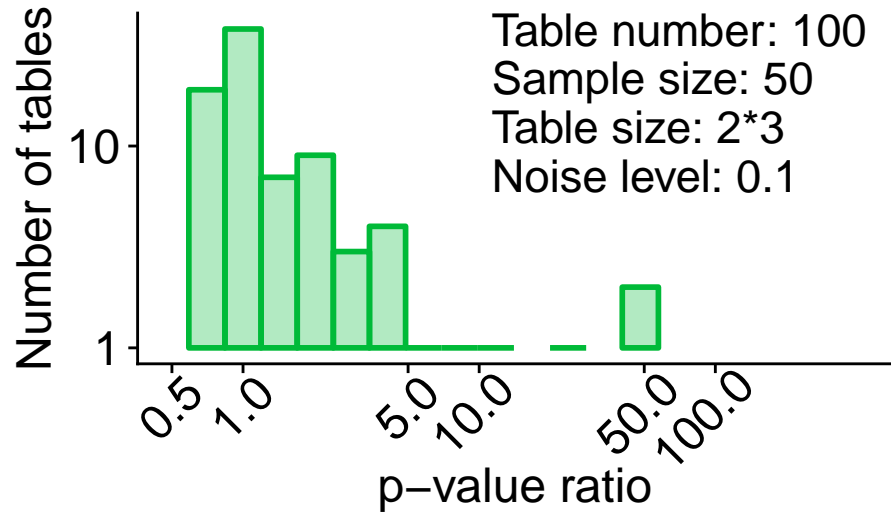**Dependent non-functional patterns**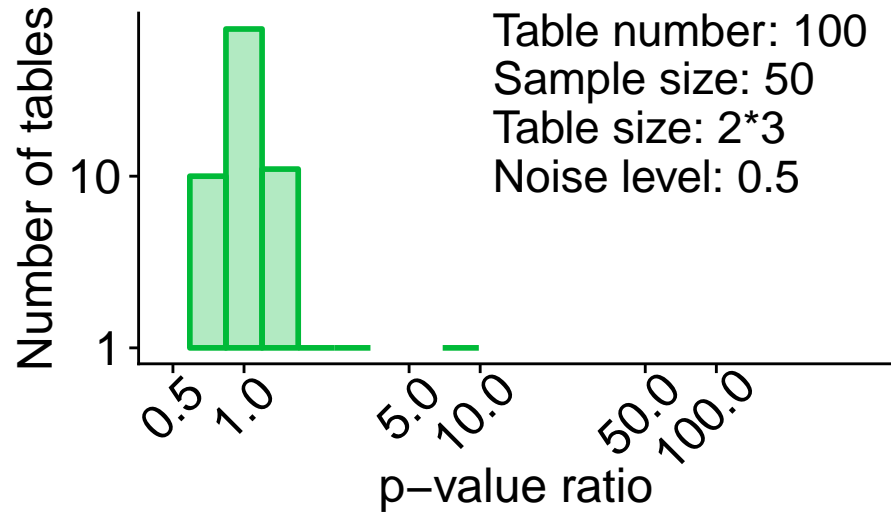

**Dependent non-functional patterns**

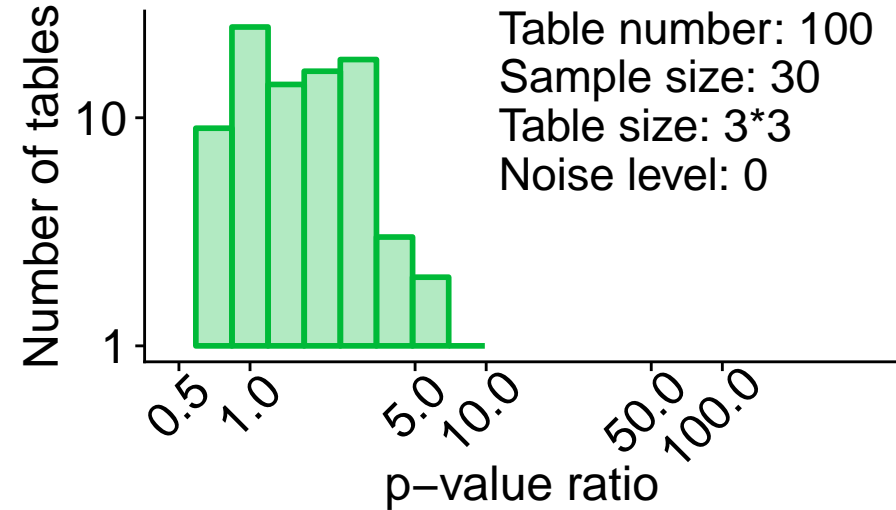

**Dependent non-functional patterns**

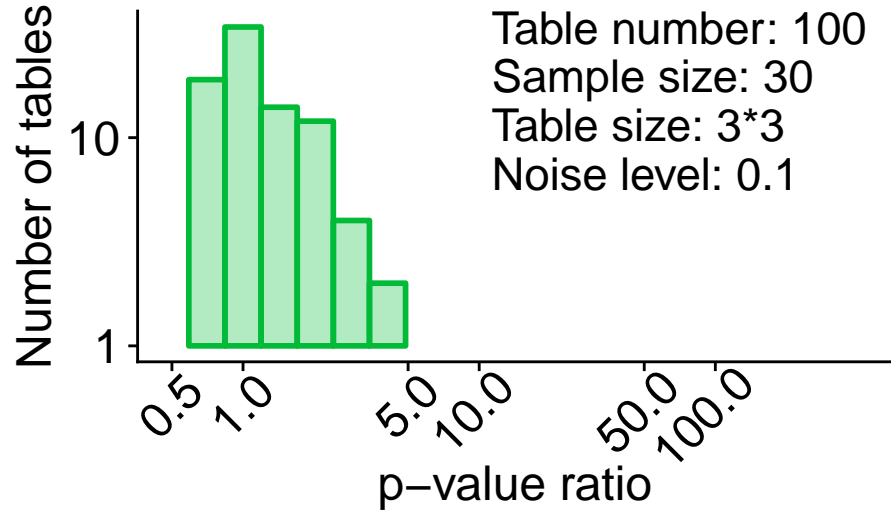

**Dependent non-functional patterns**

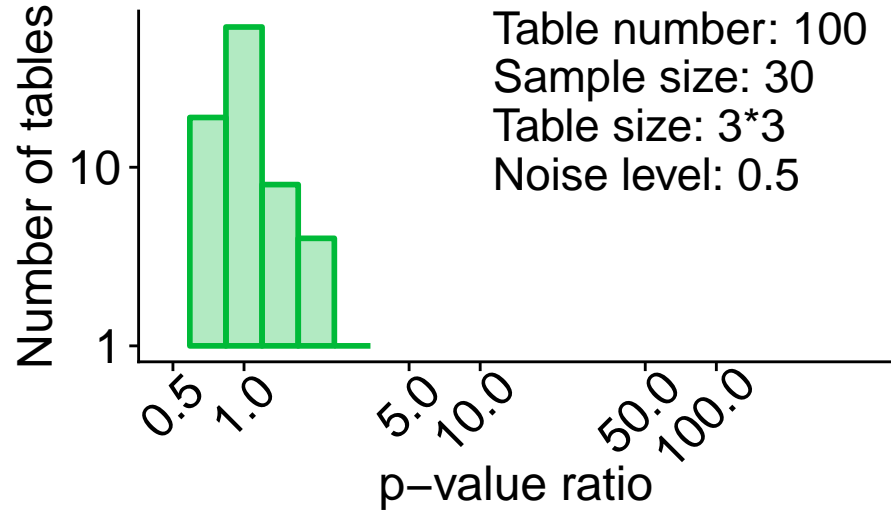

**Dependent non-functional patterns**

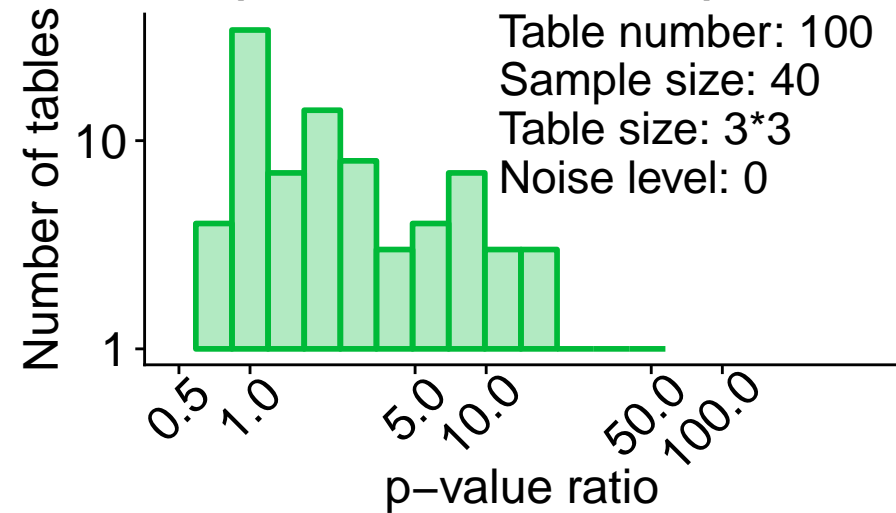

**Dependent non-functional patterns**

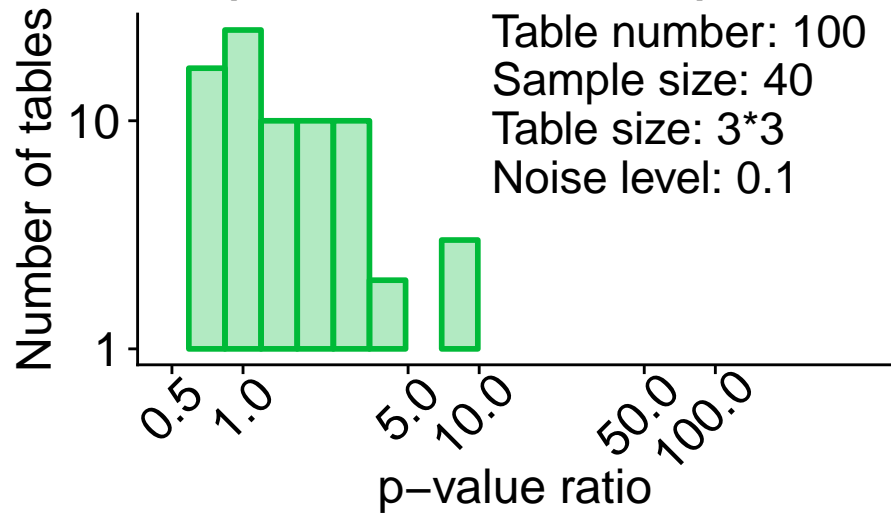

**Dependent non-functional patterns**

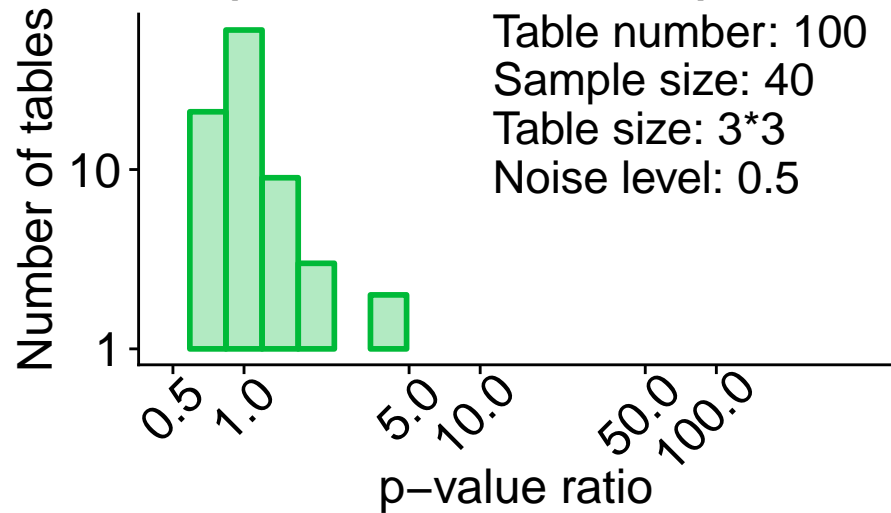

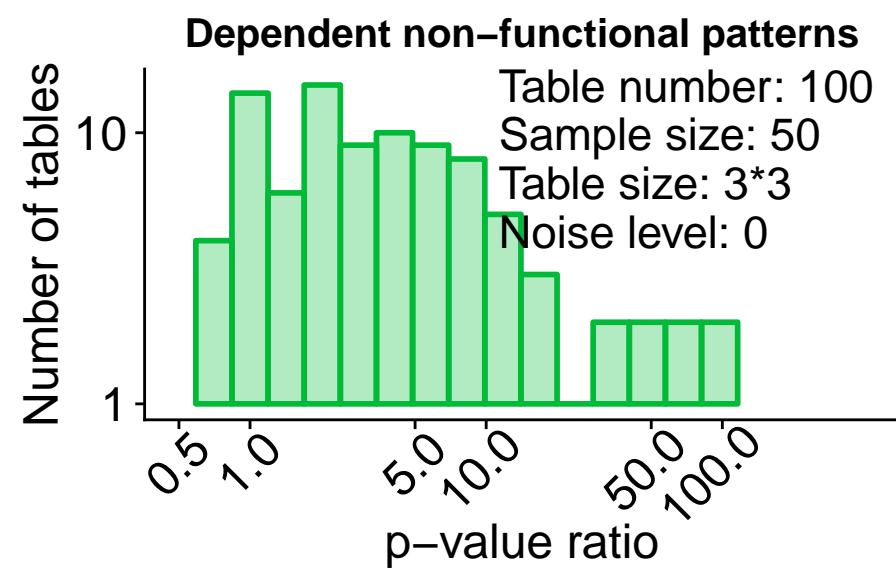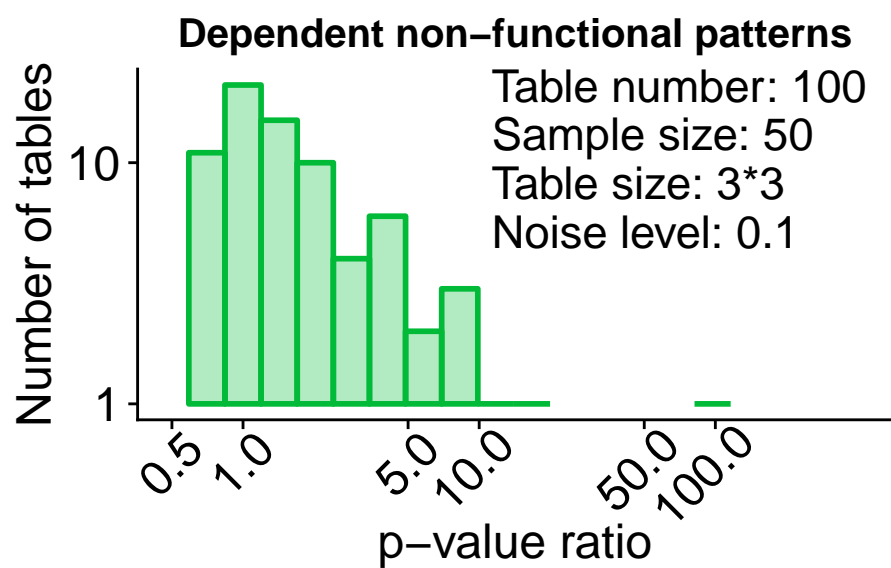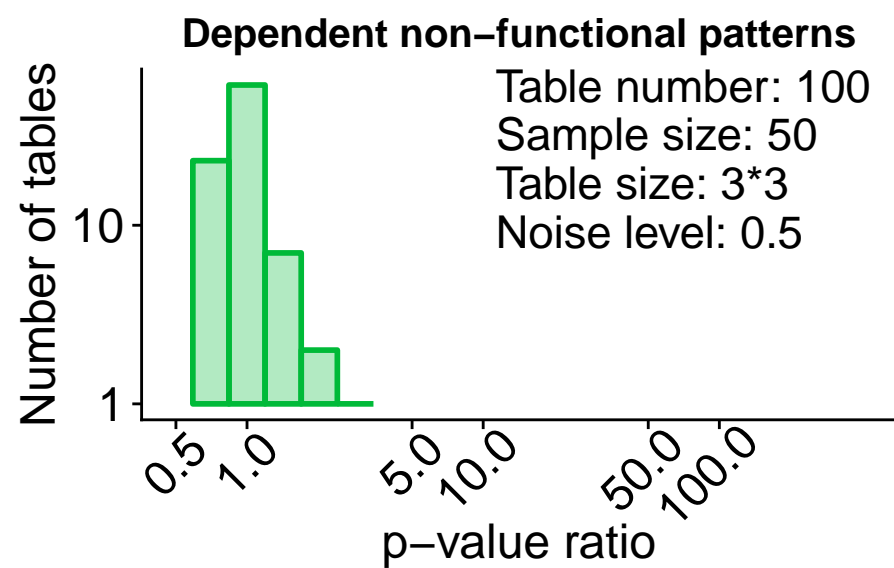

**Dependent non-functional patterns**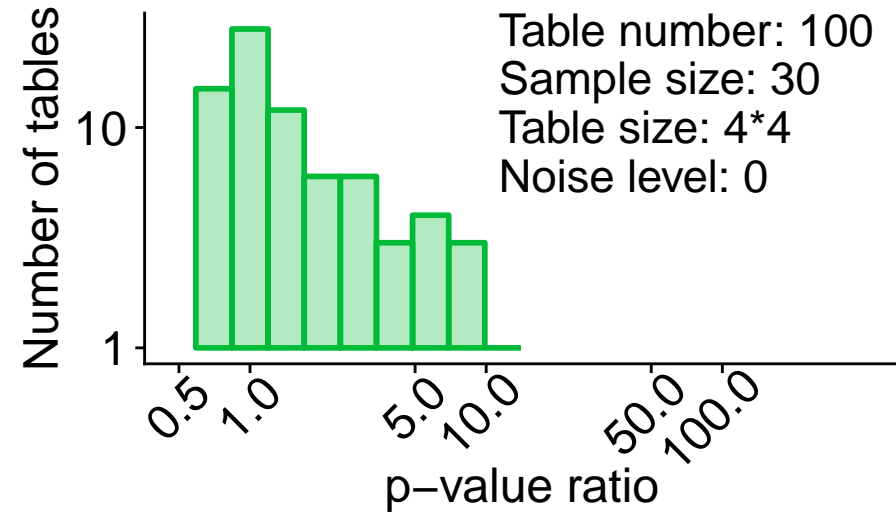**Dependent non-functional patterns**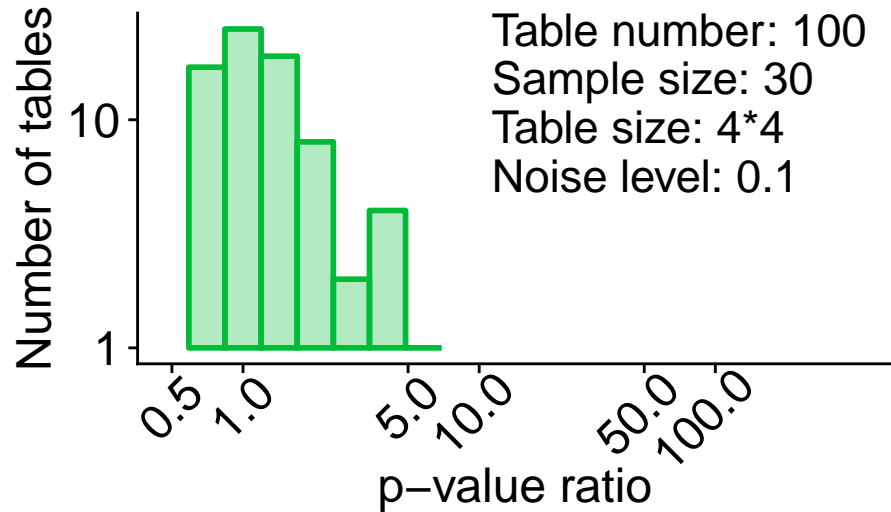**Dependent non-functional patterns**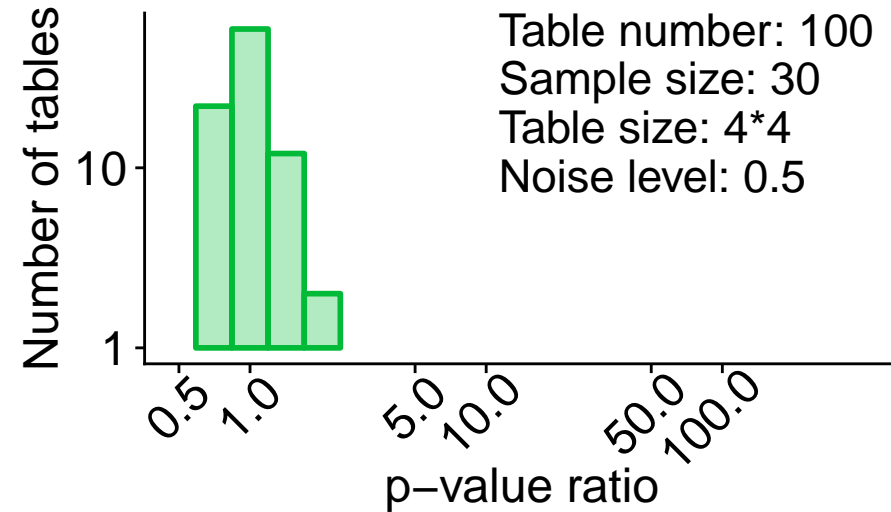

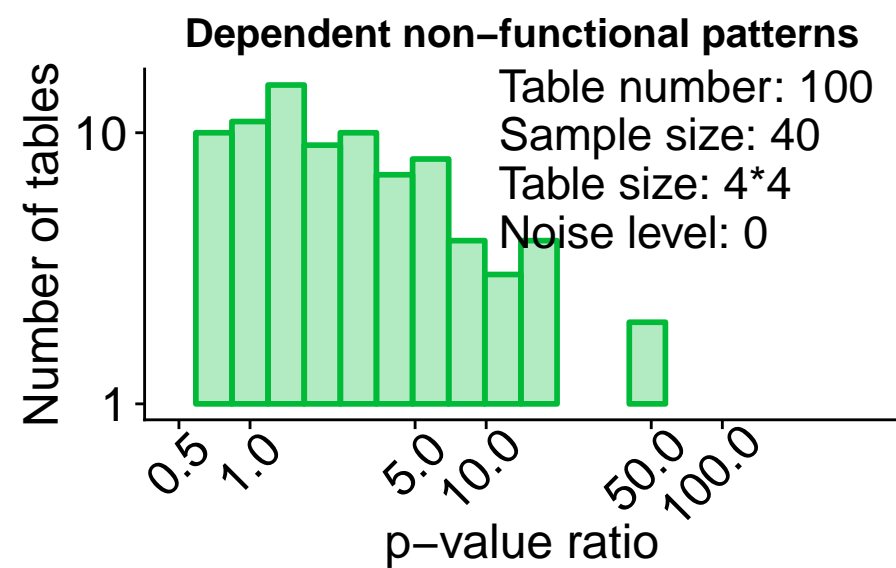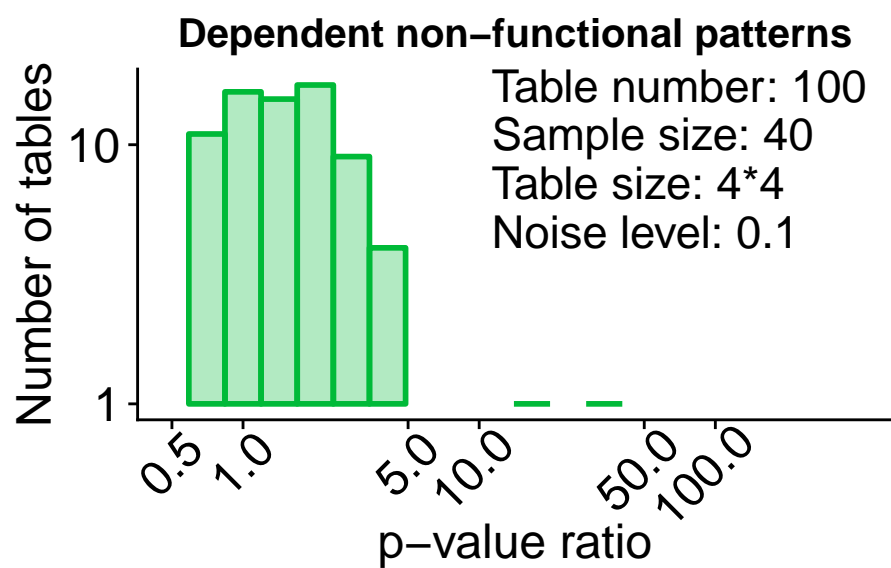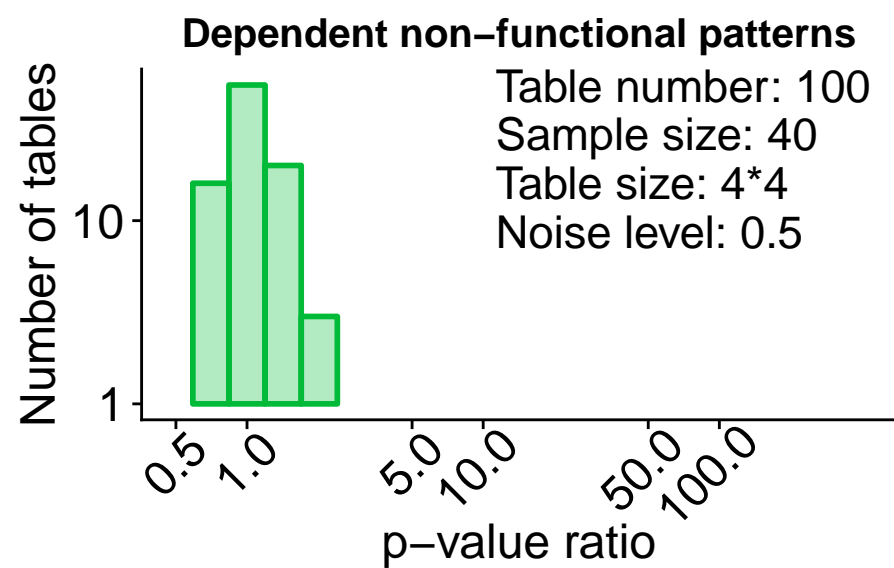



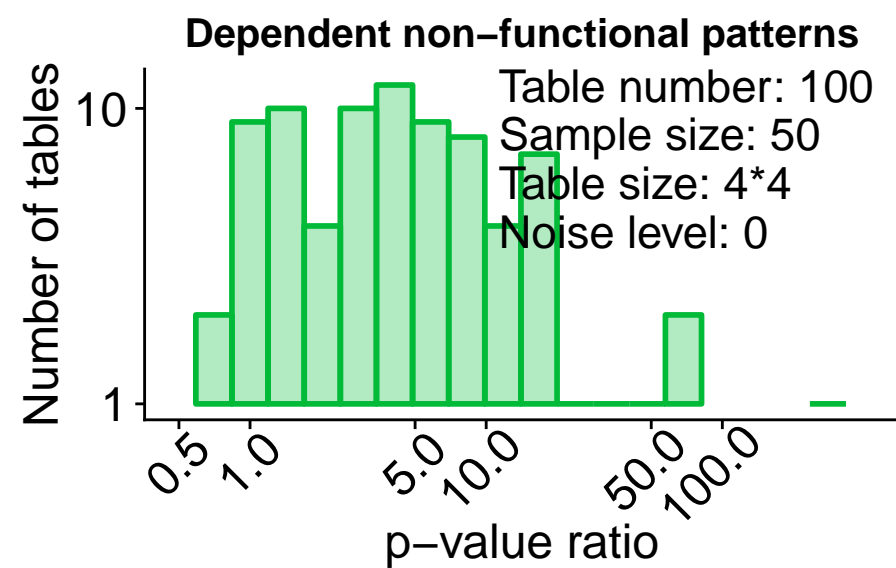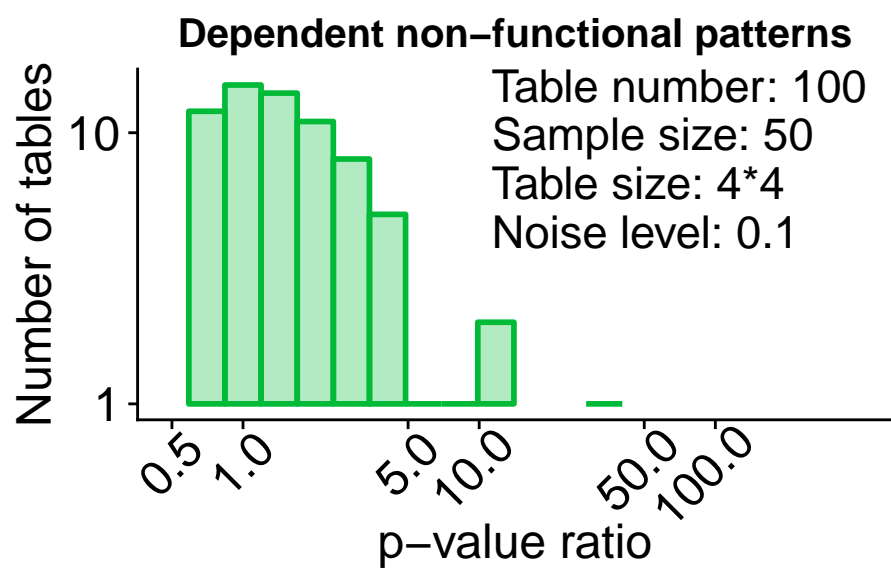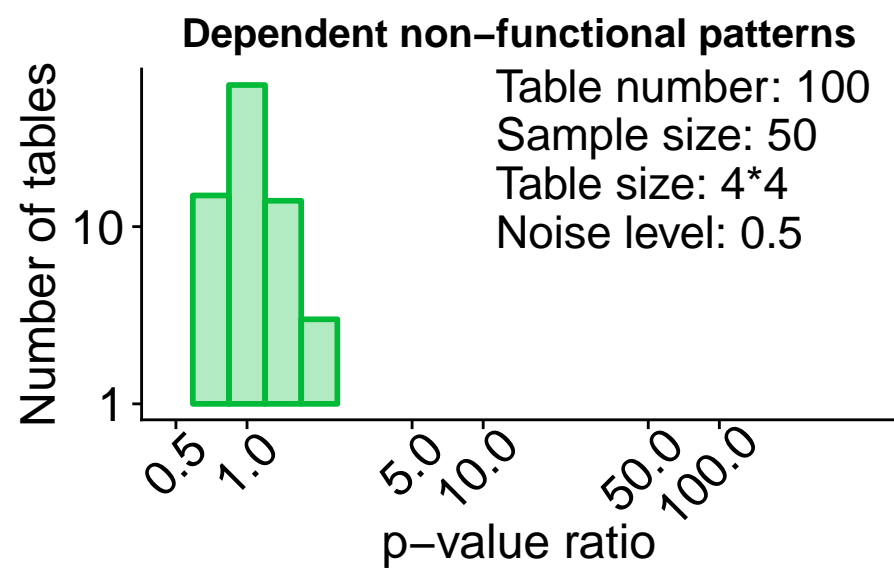

Supplement: NIHMS972140-supplement-Supplementary_File_3.pdf [file NIHMS972140-supplement-Supplementary_File_3.pdf]
