# Supplementary material
Source: PubMed Central journal article supplement (PMC6109616)

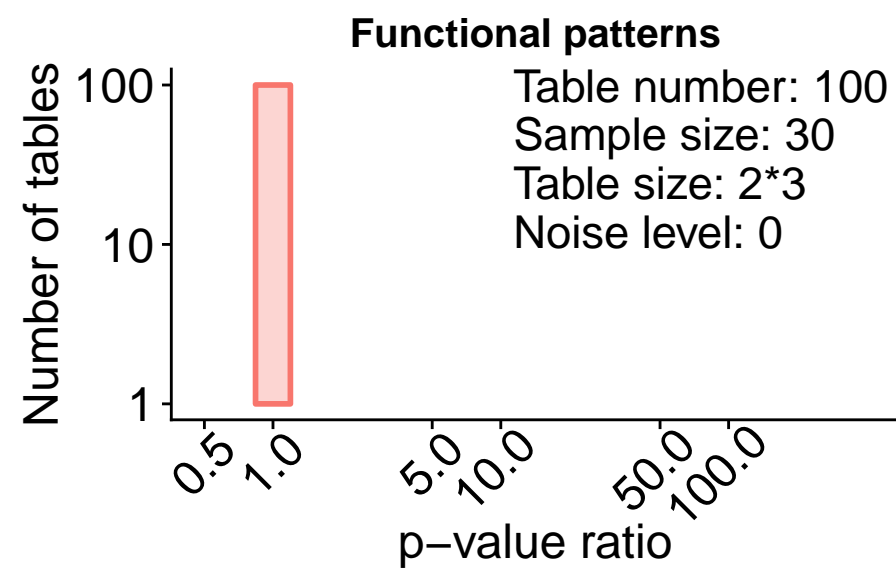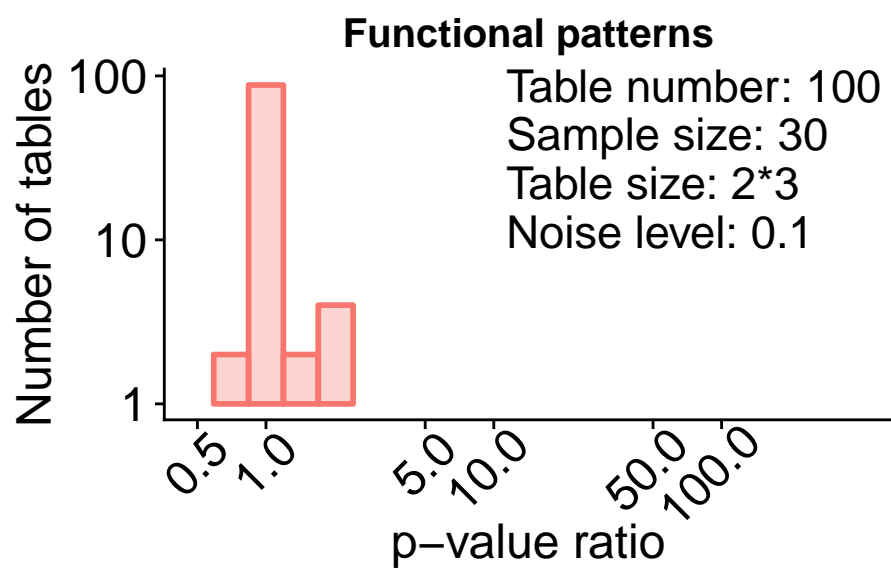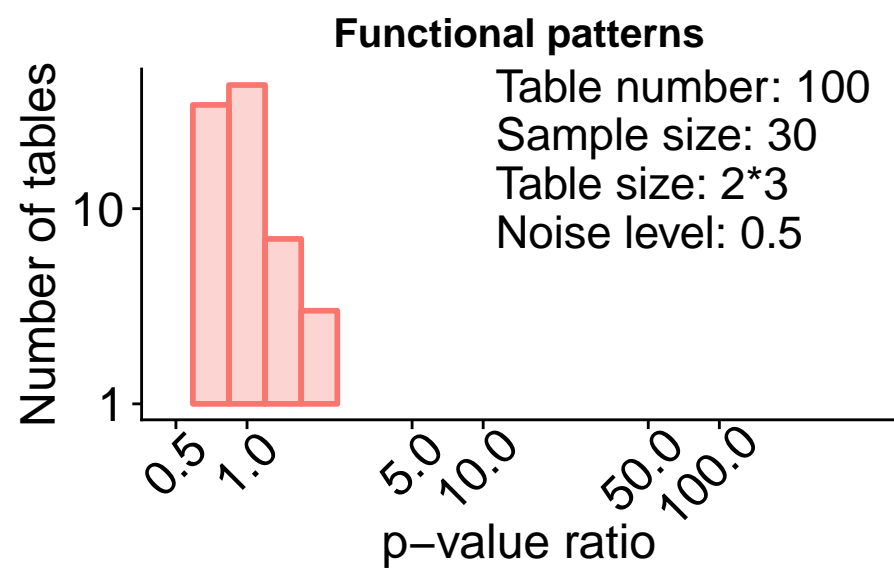

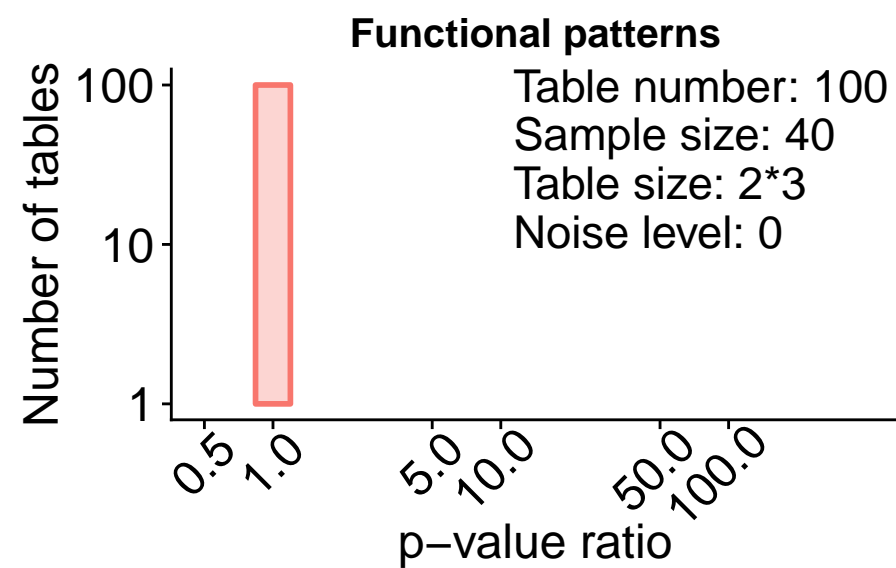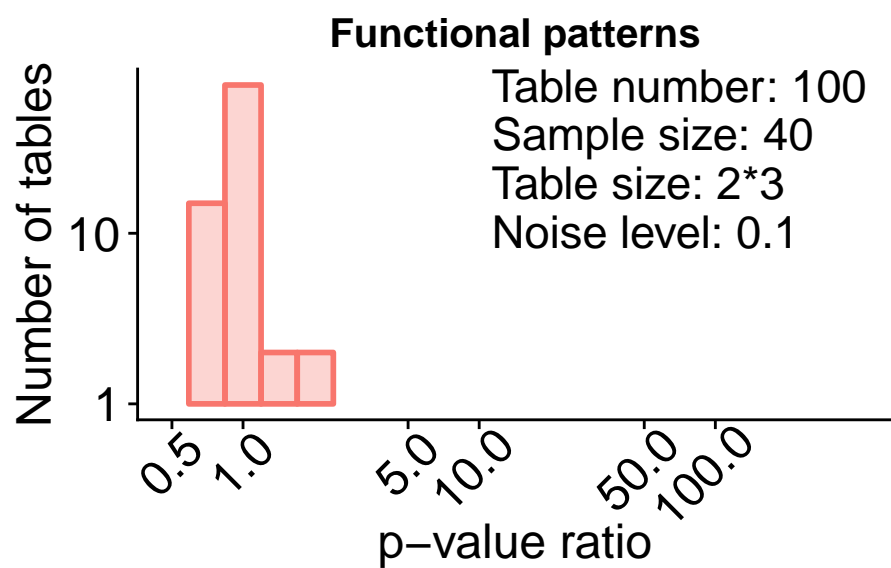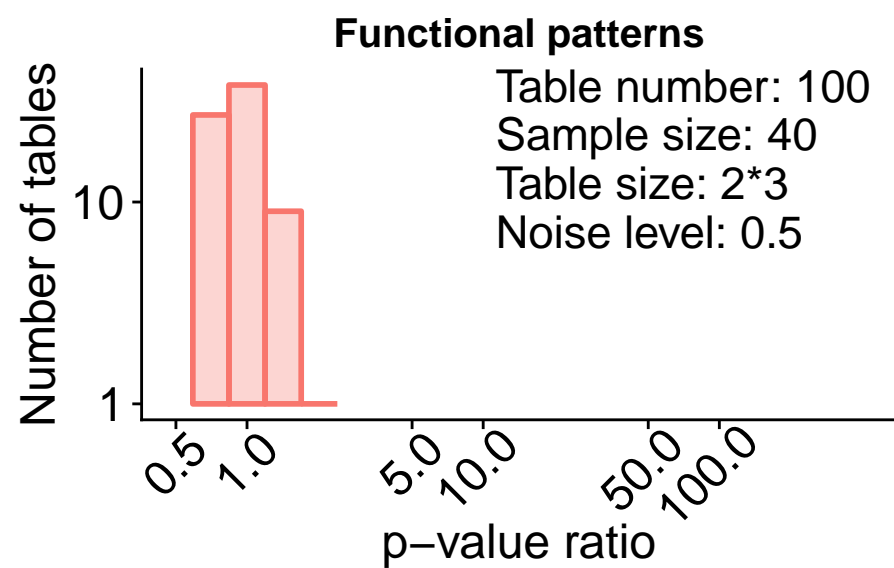

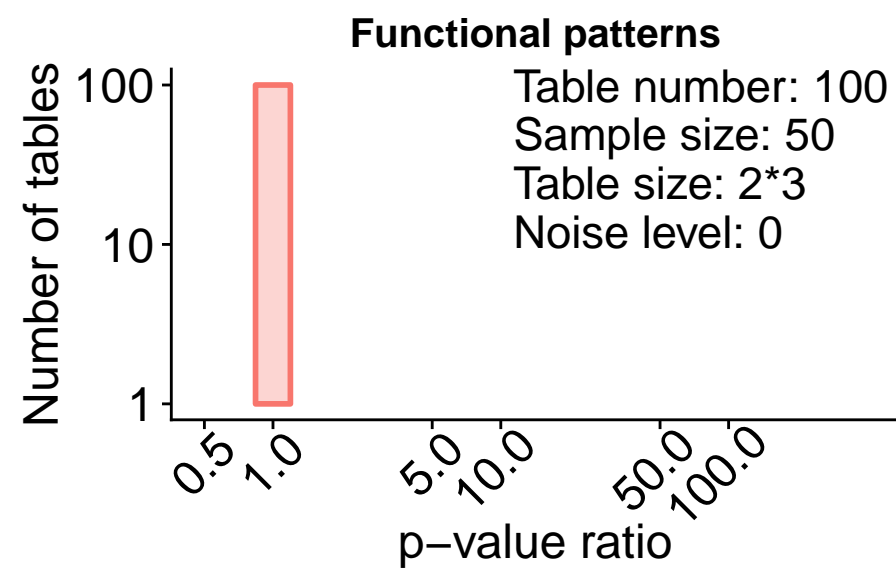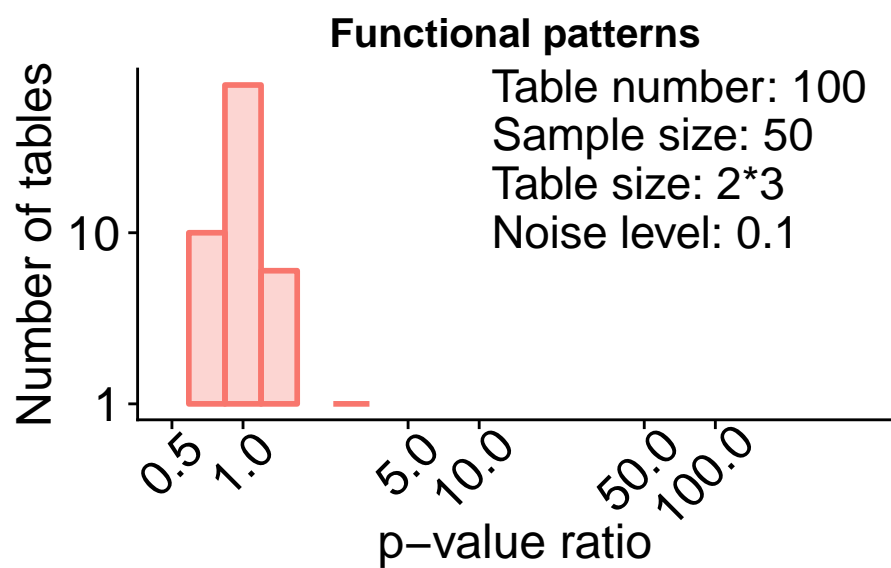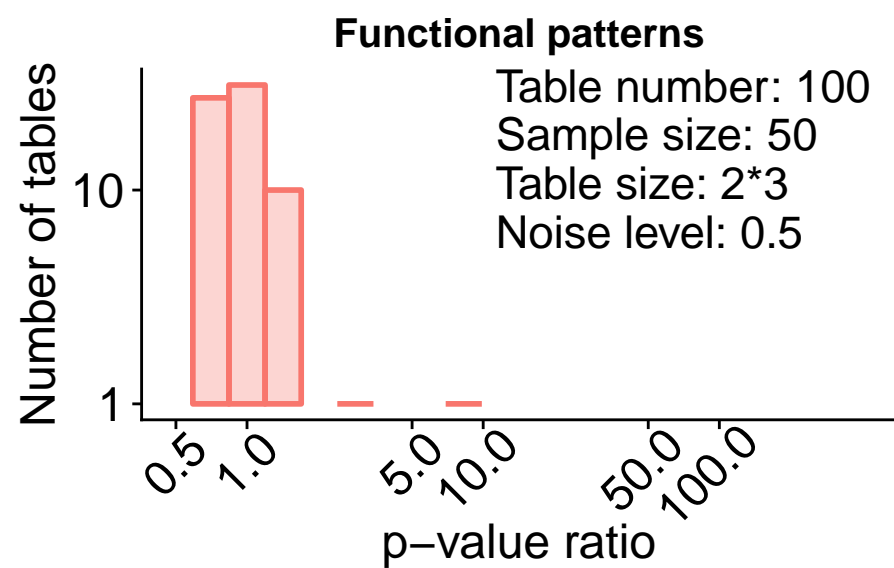

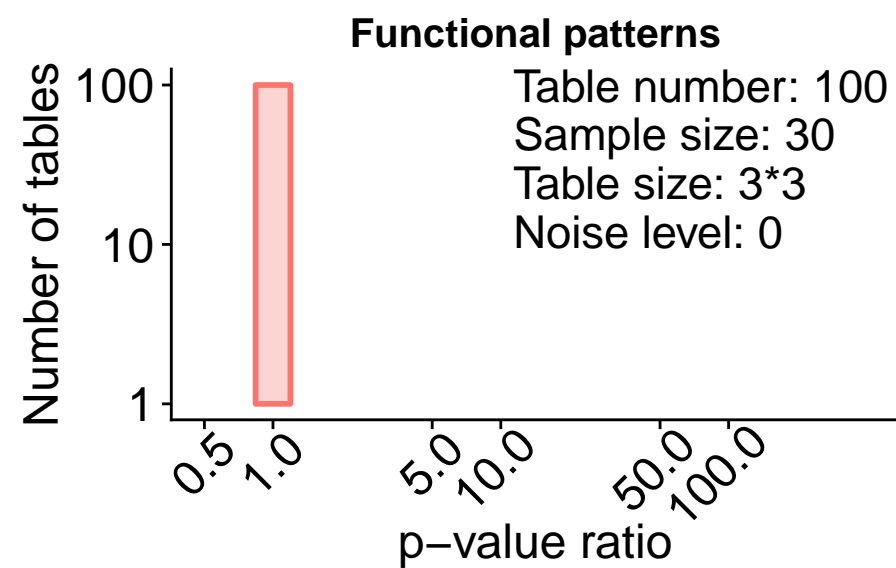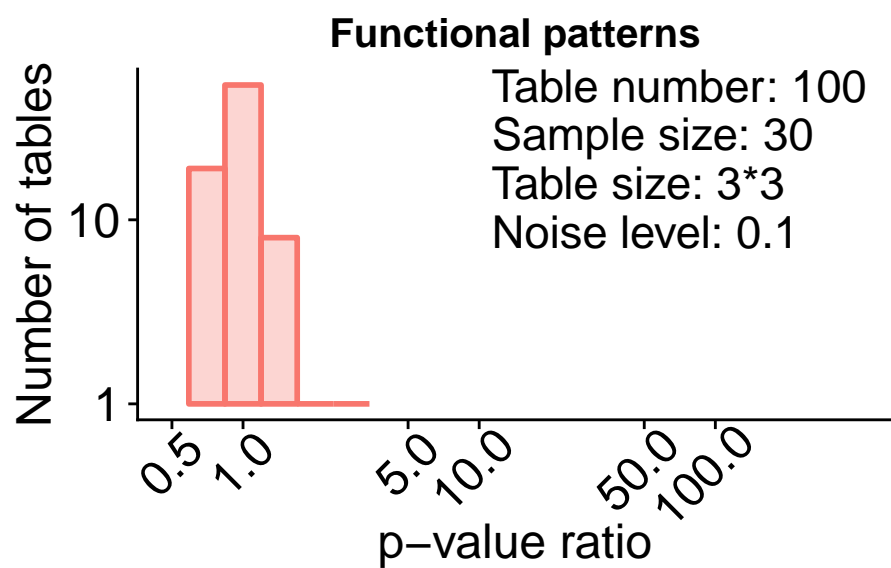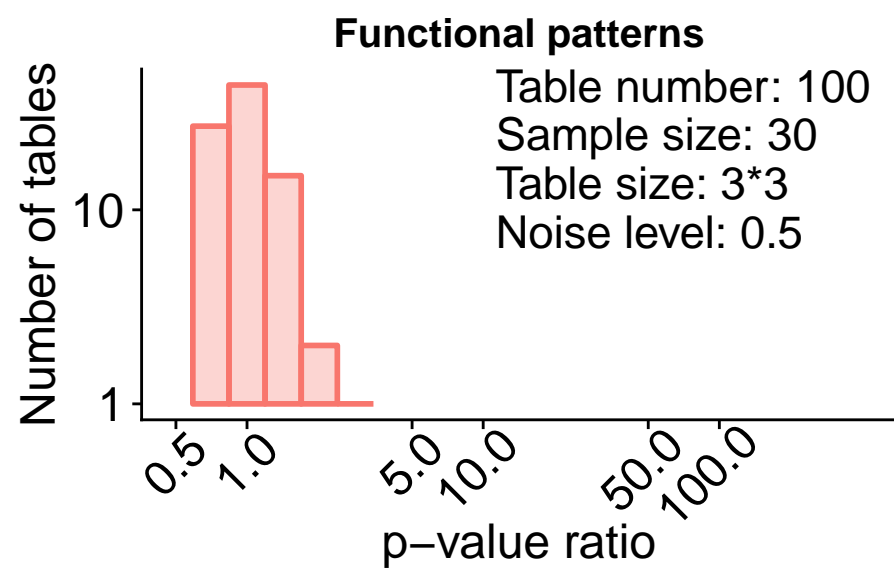

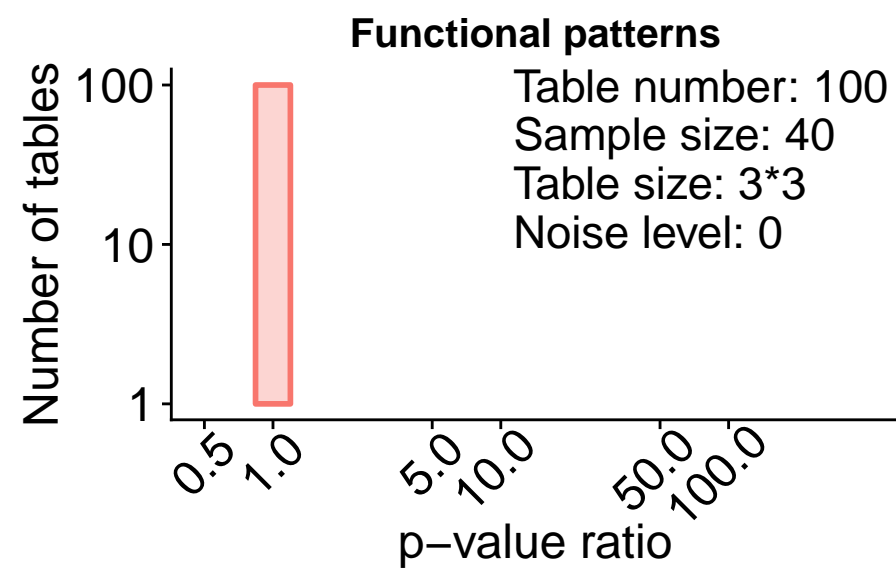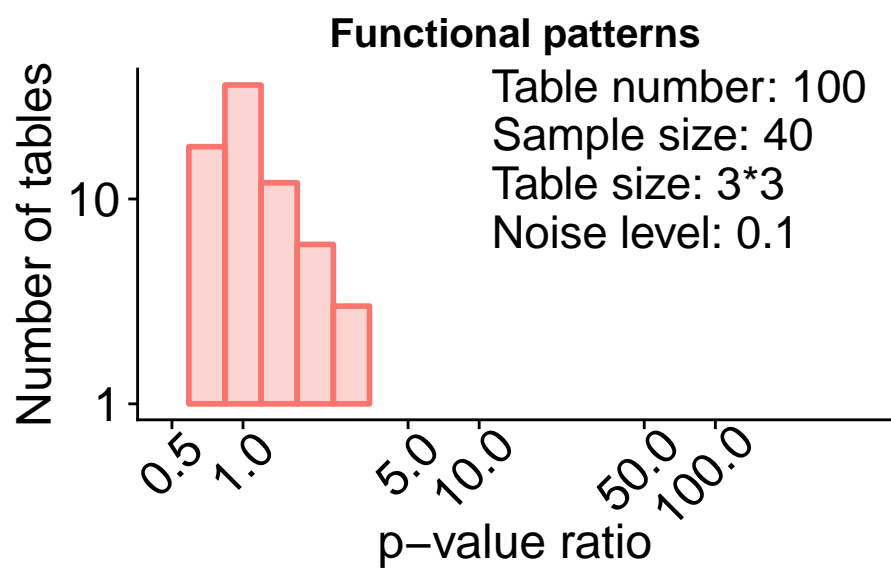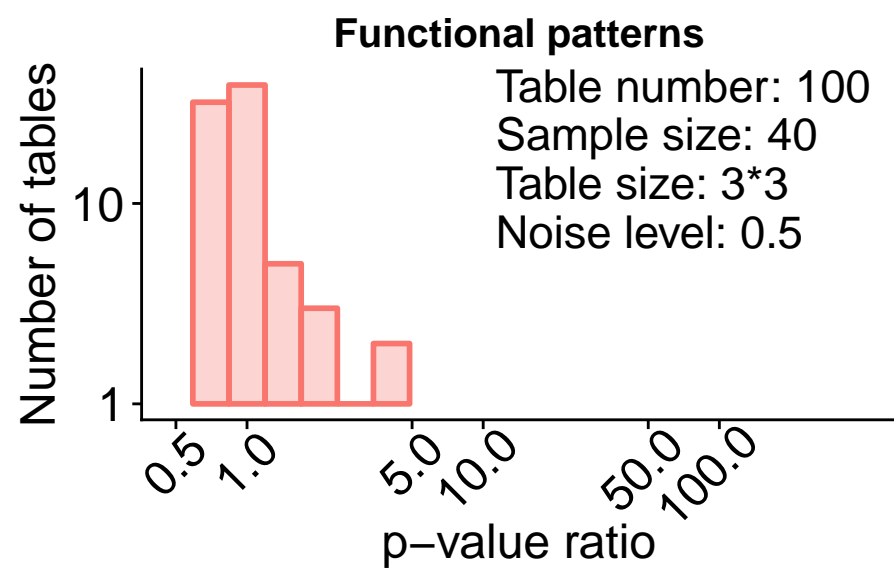

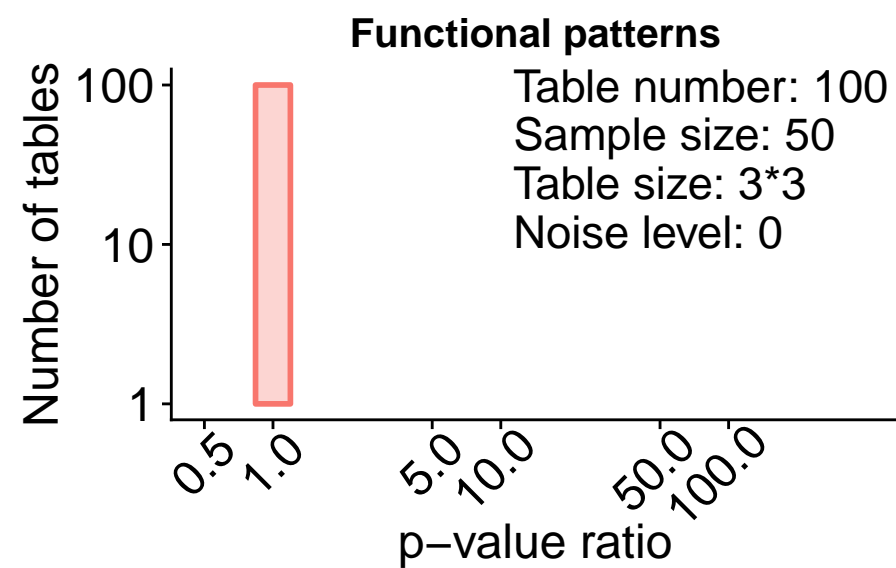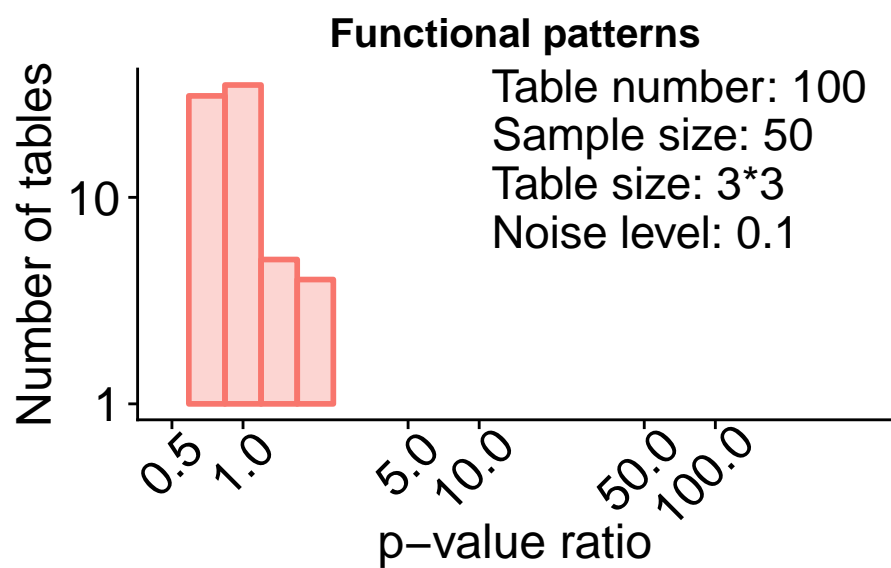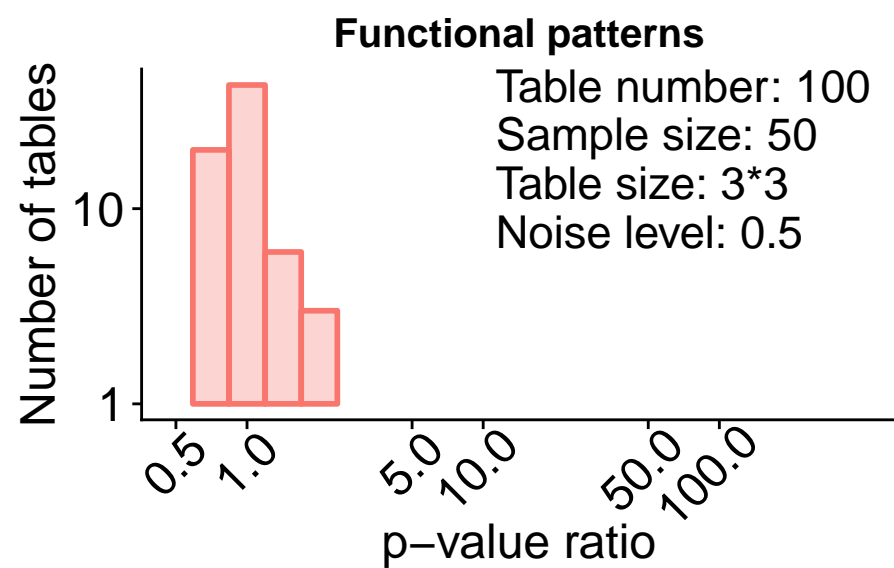

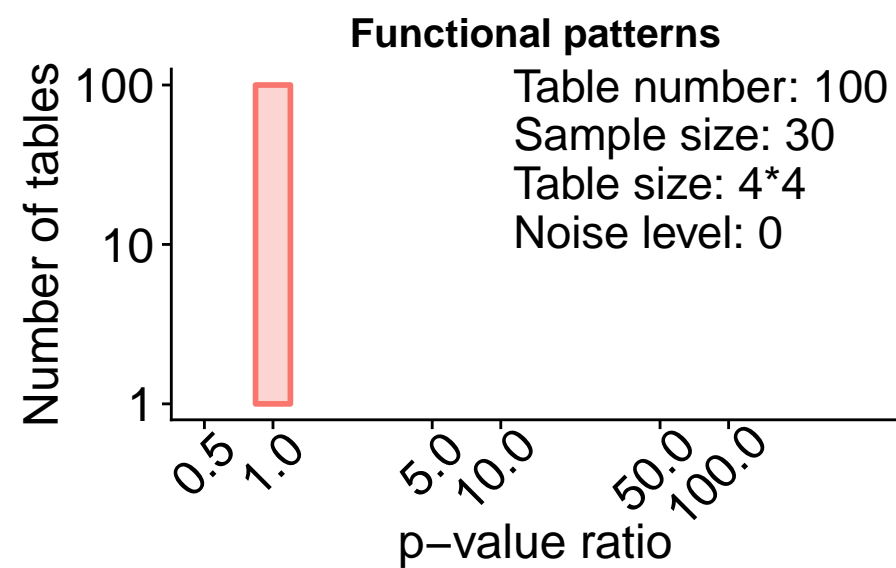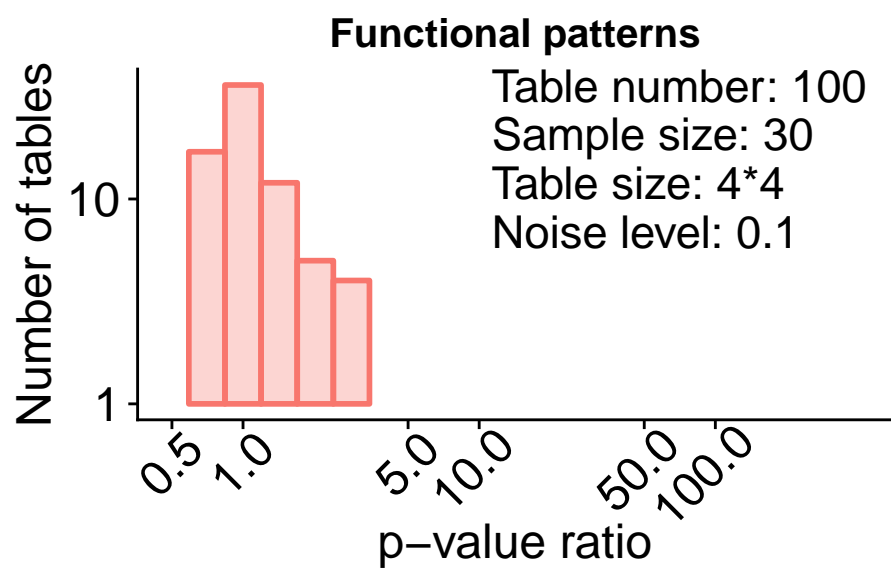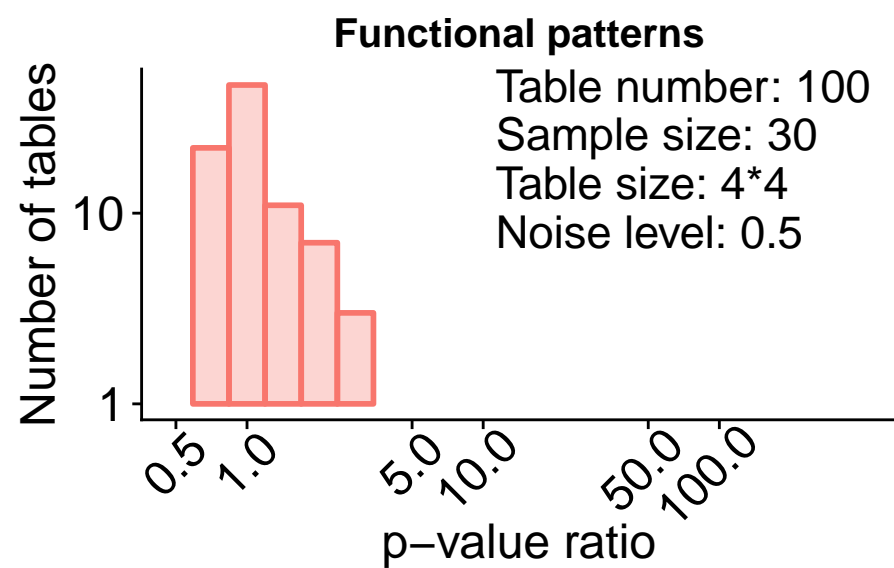

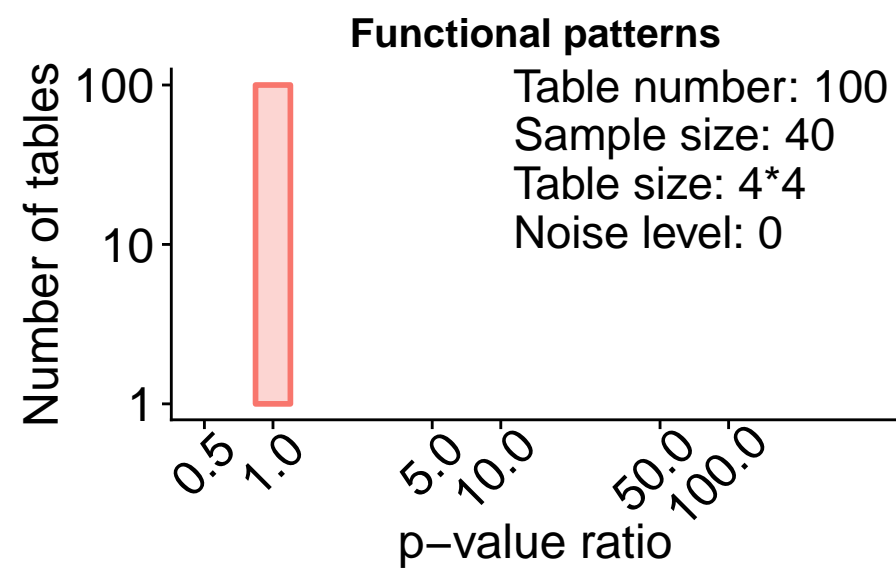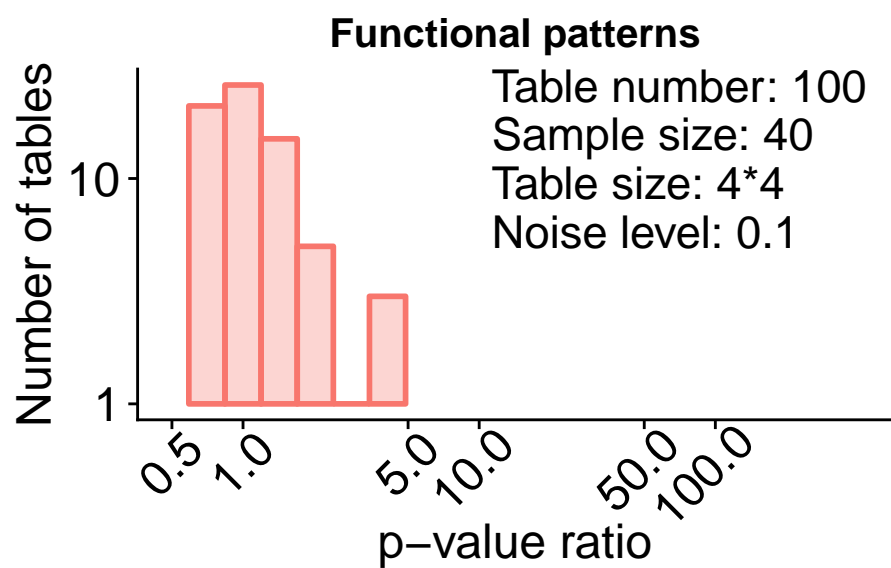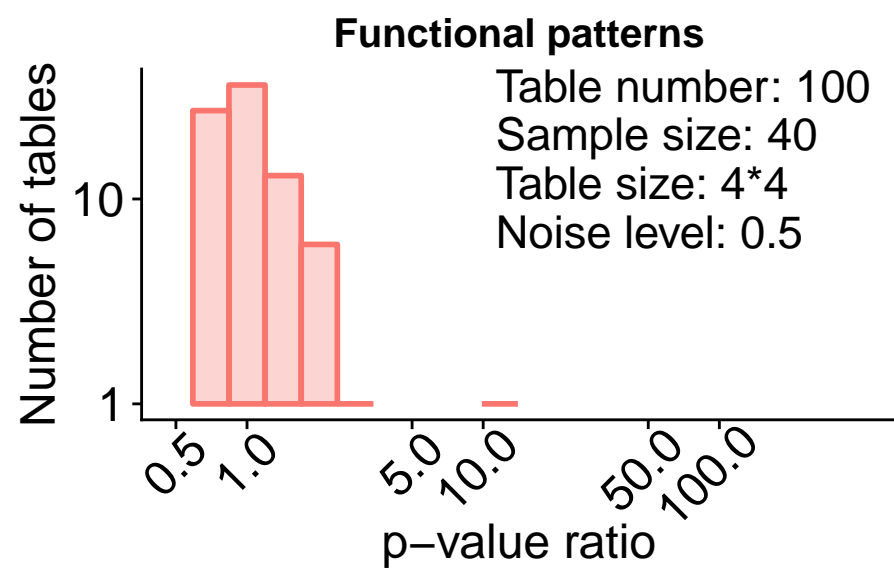



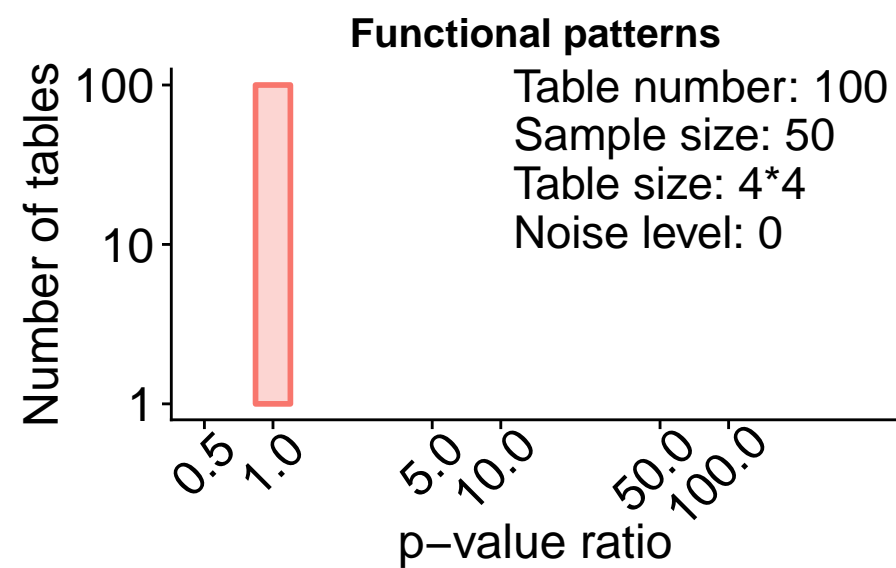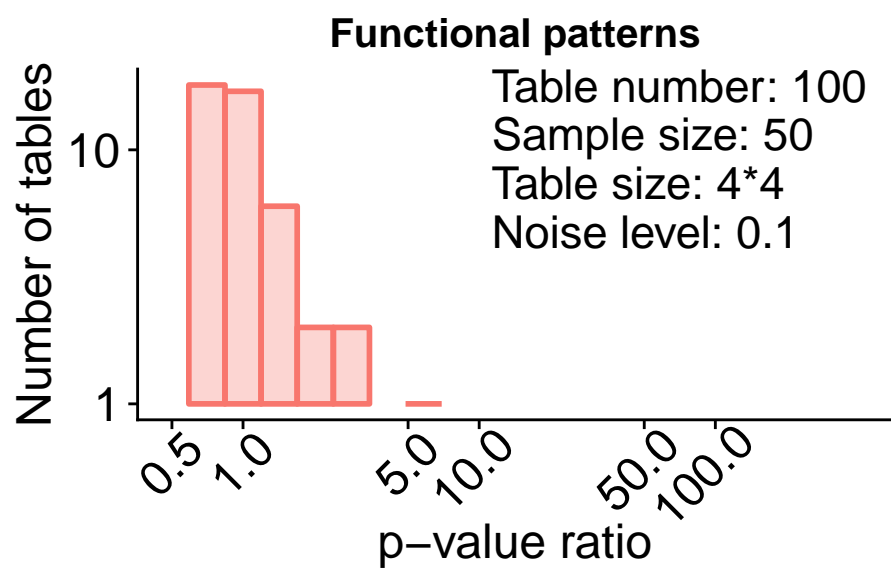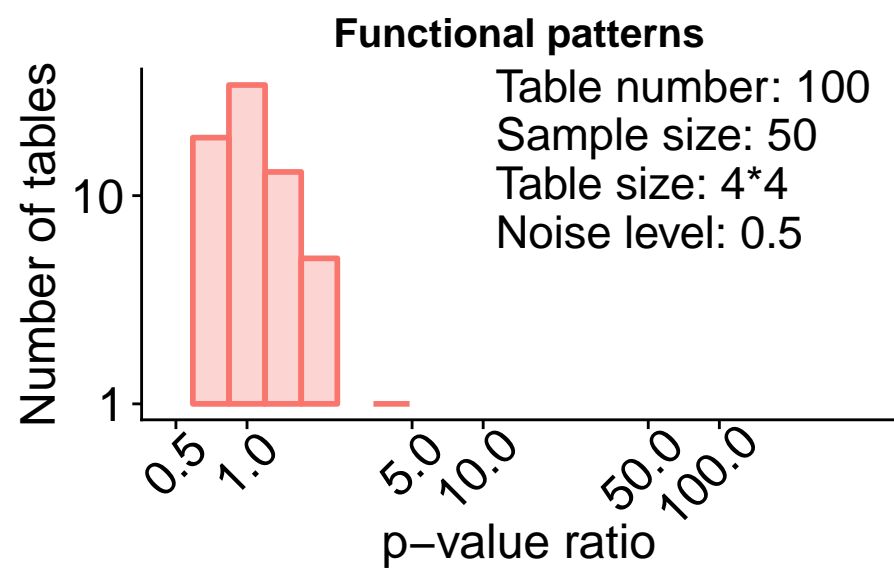

Supplement: NIHMS972140-supplement-Supplementary_File_2.pdf [file NIHMS972140-supplement-Supplementary_File_2.pdf]

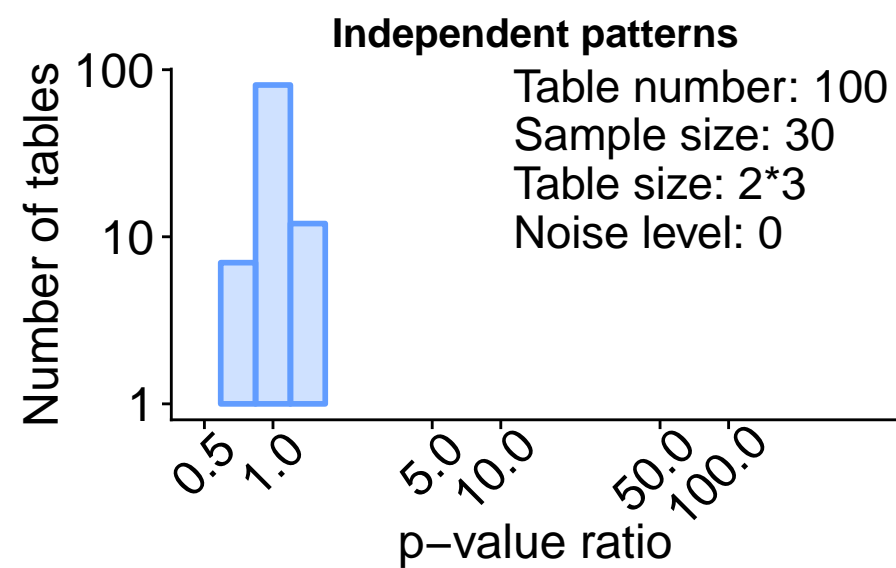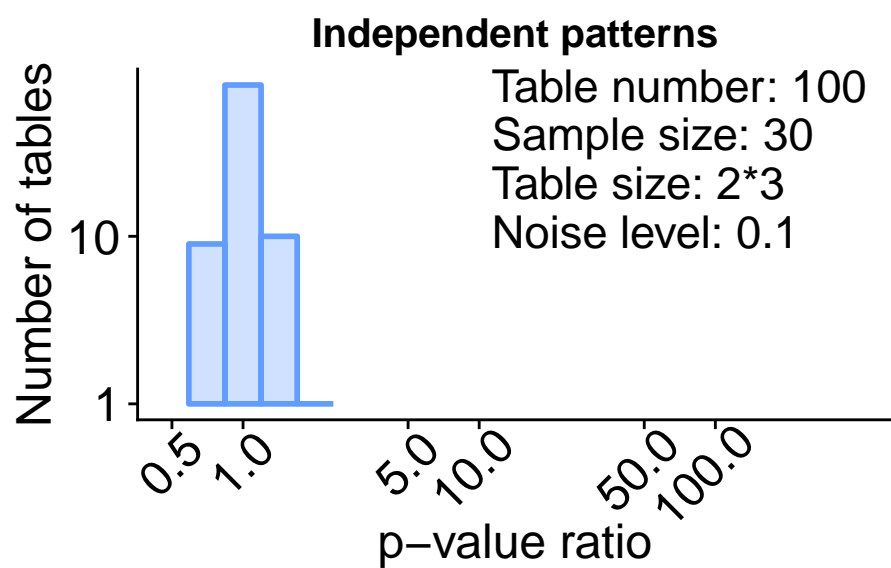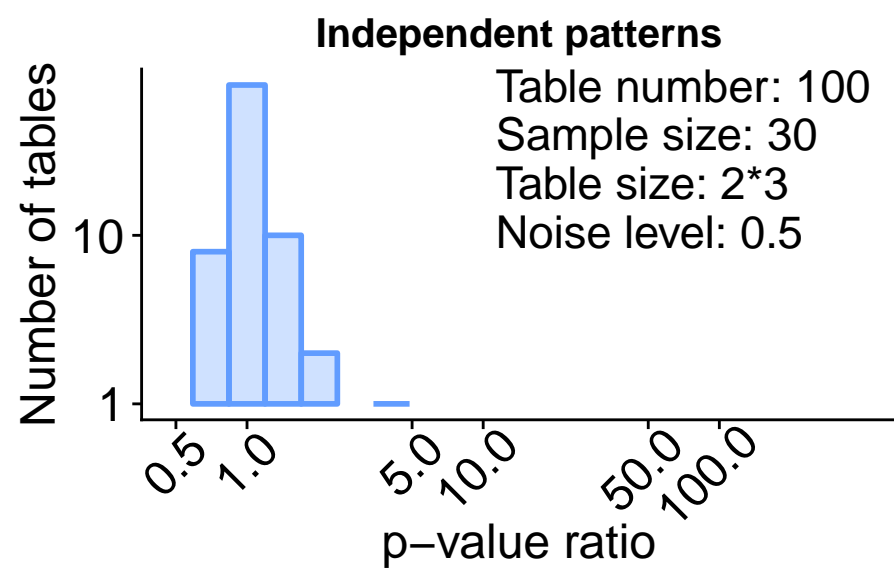

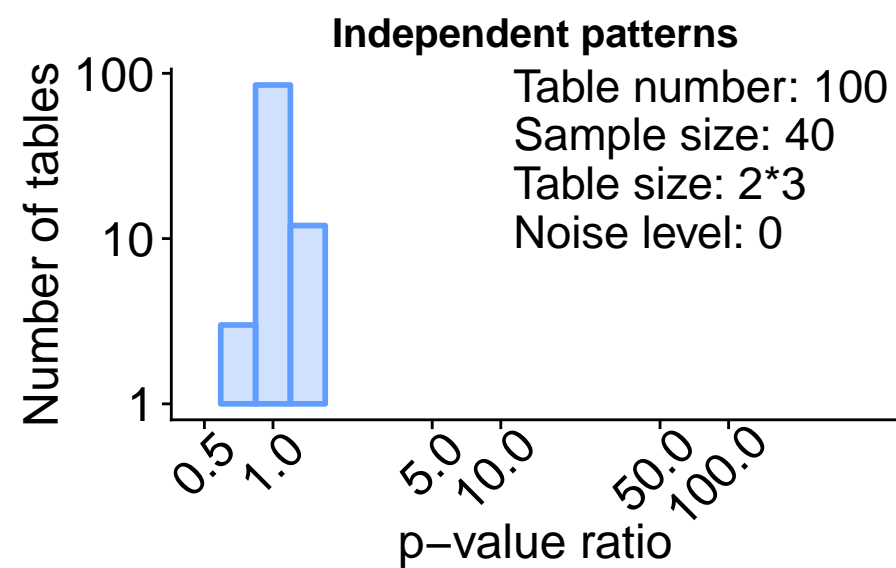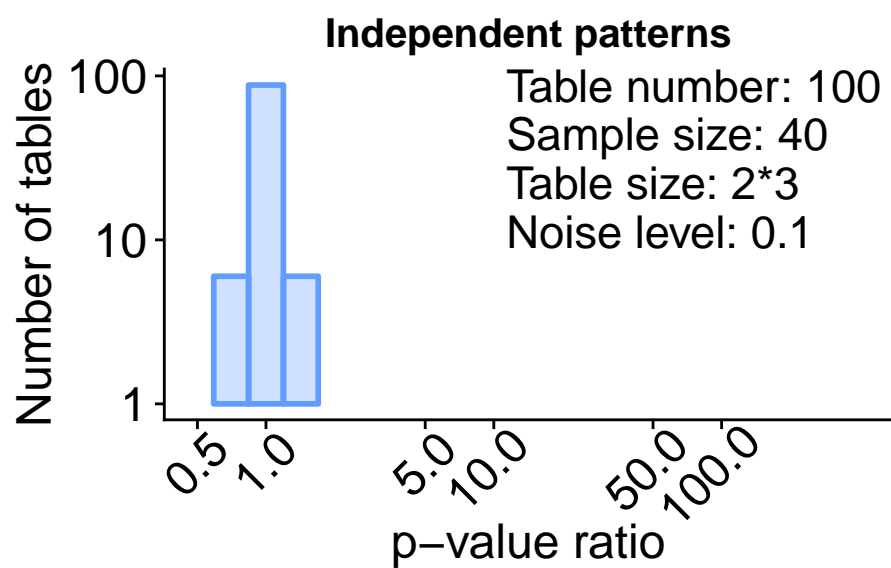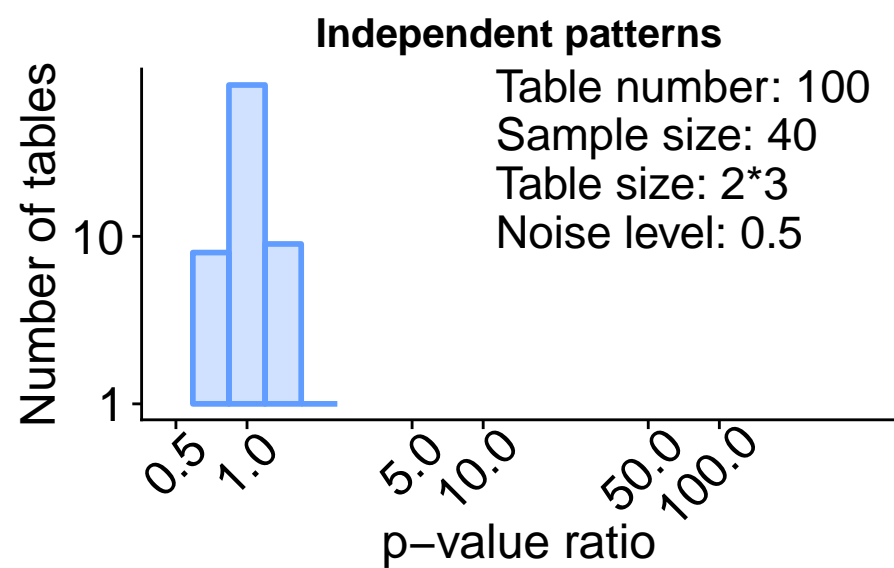

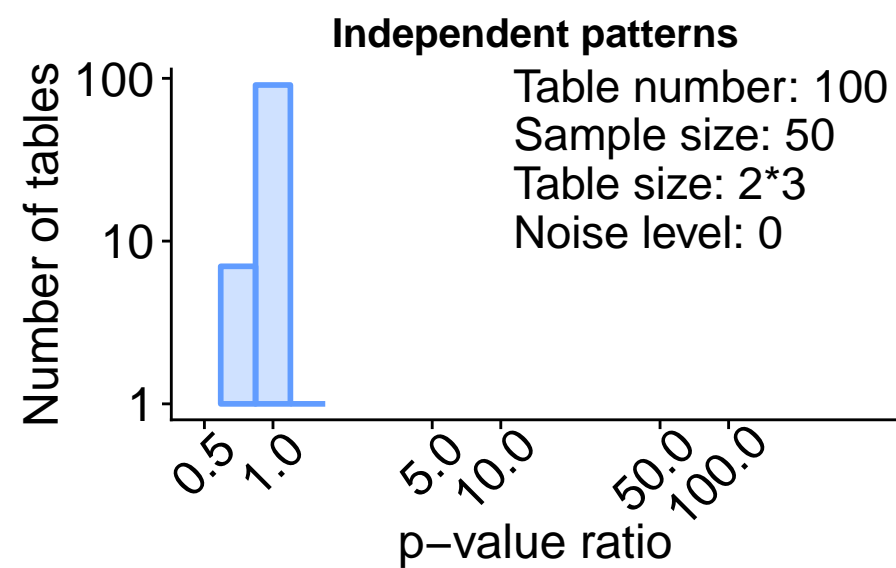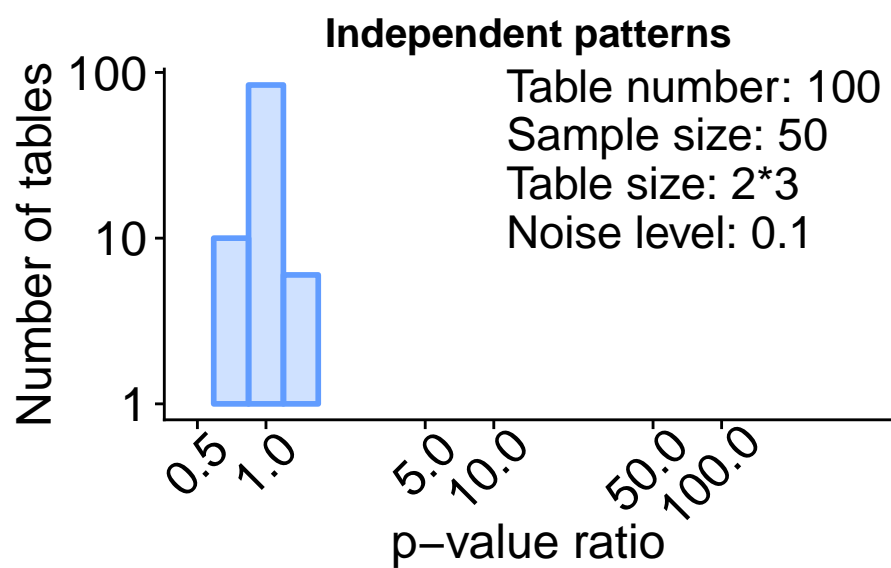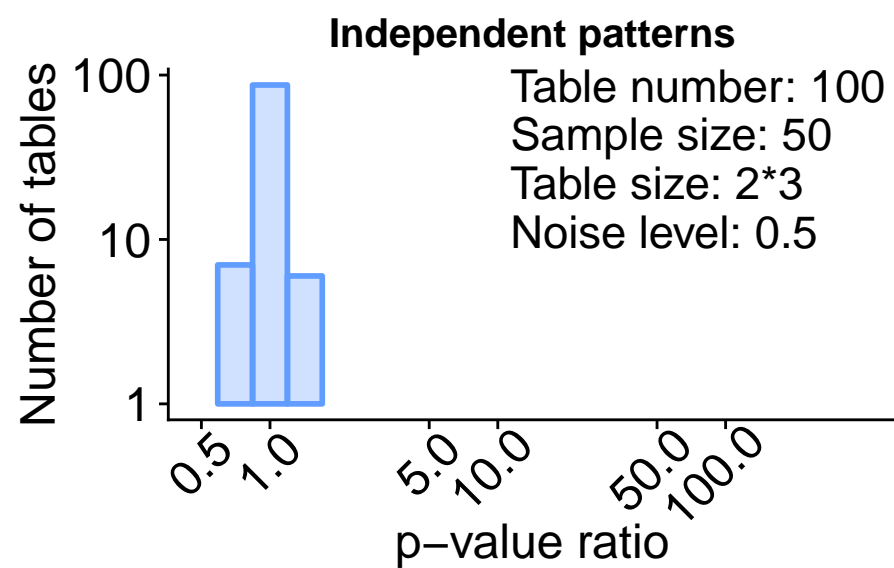

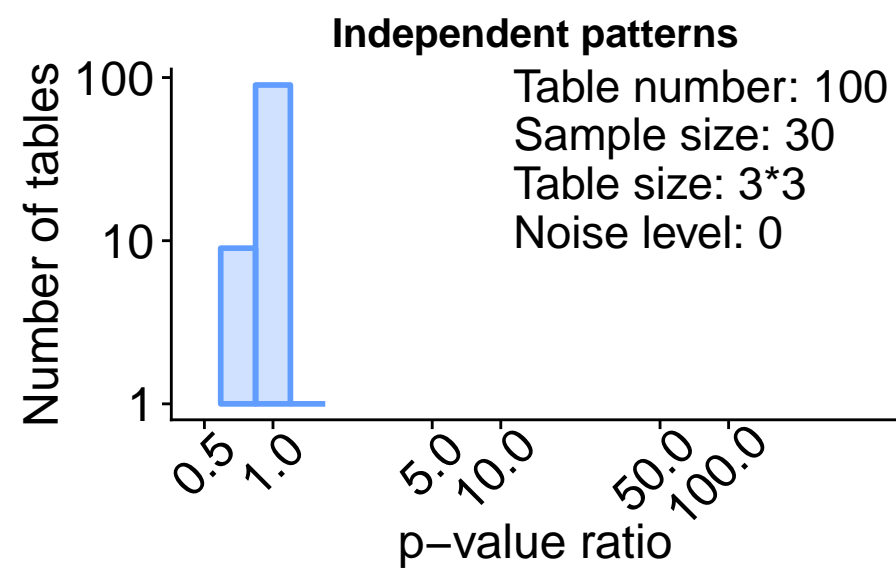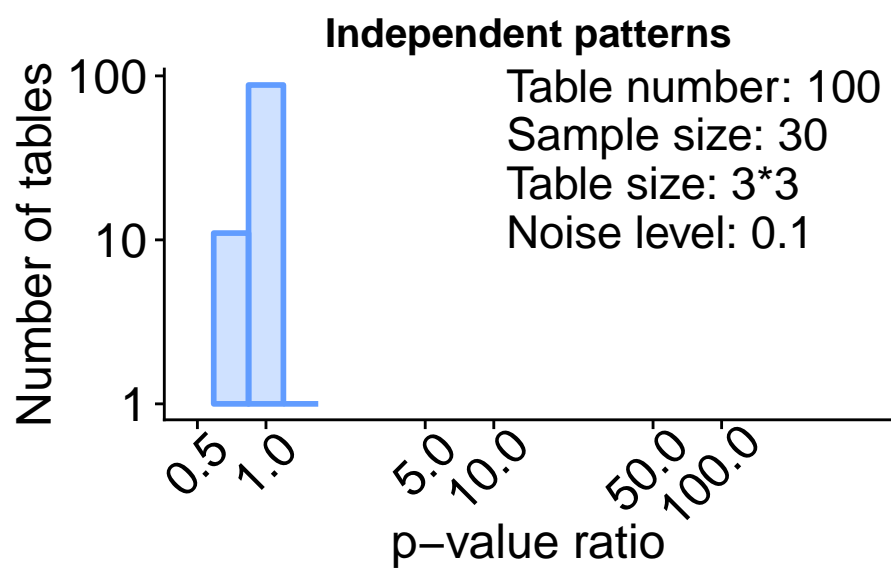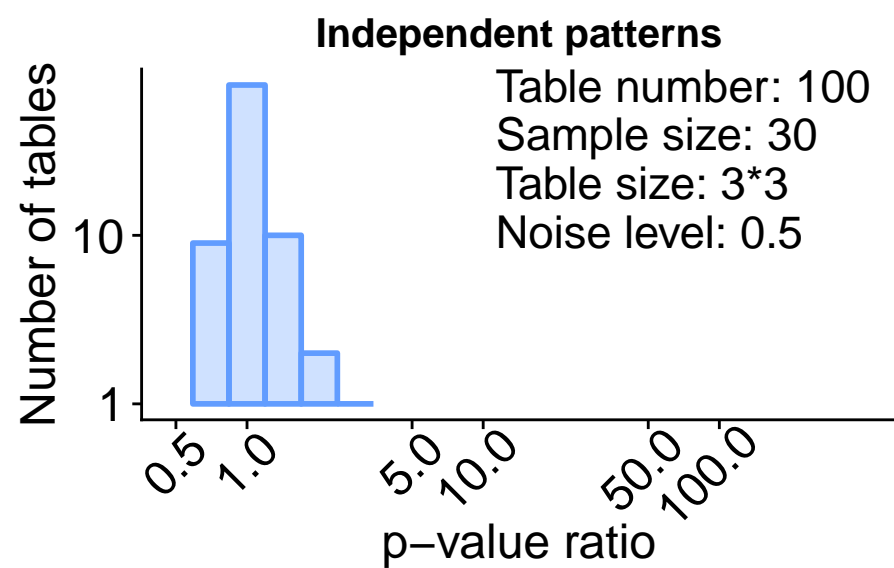

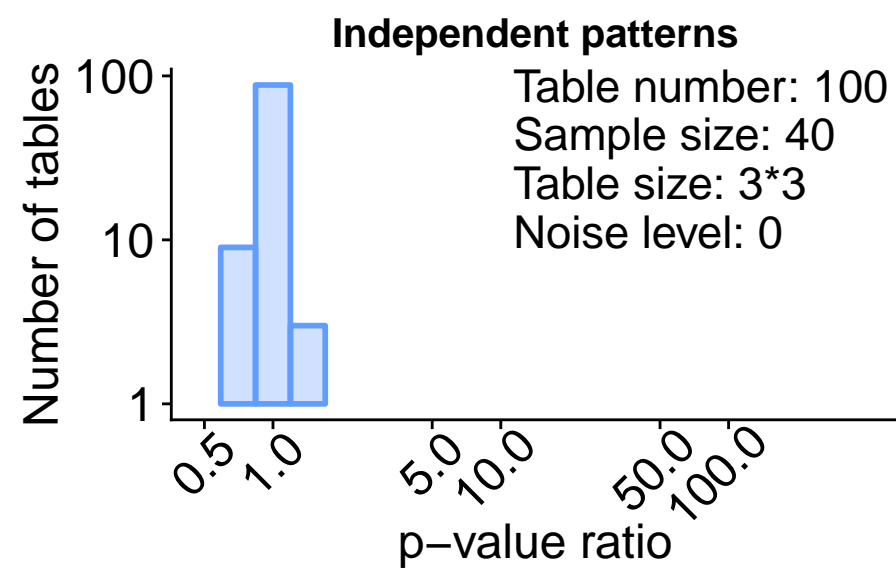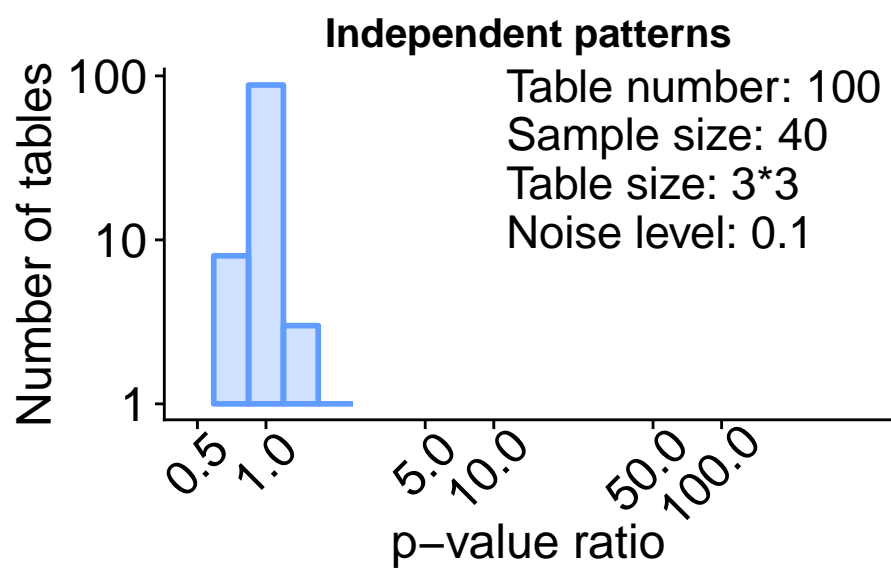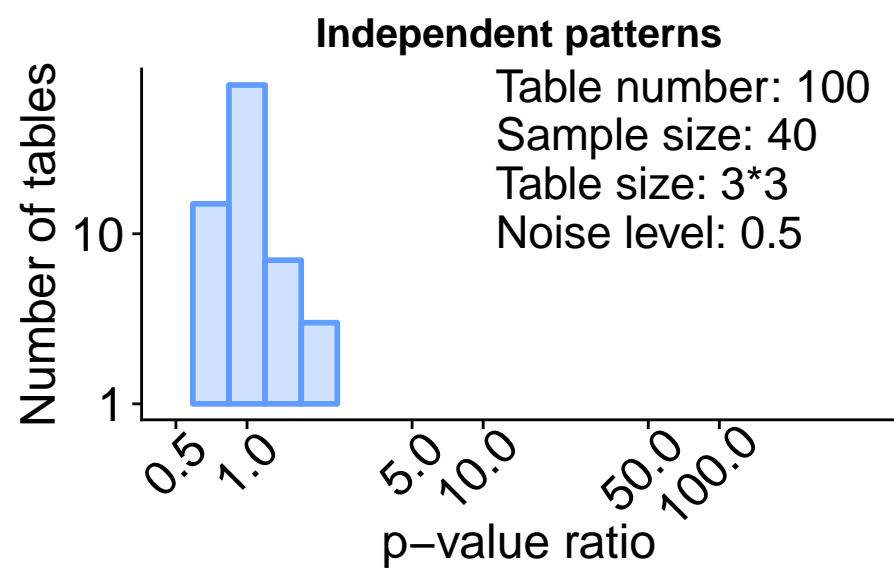

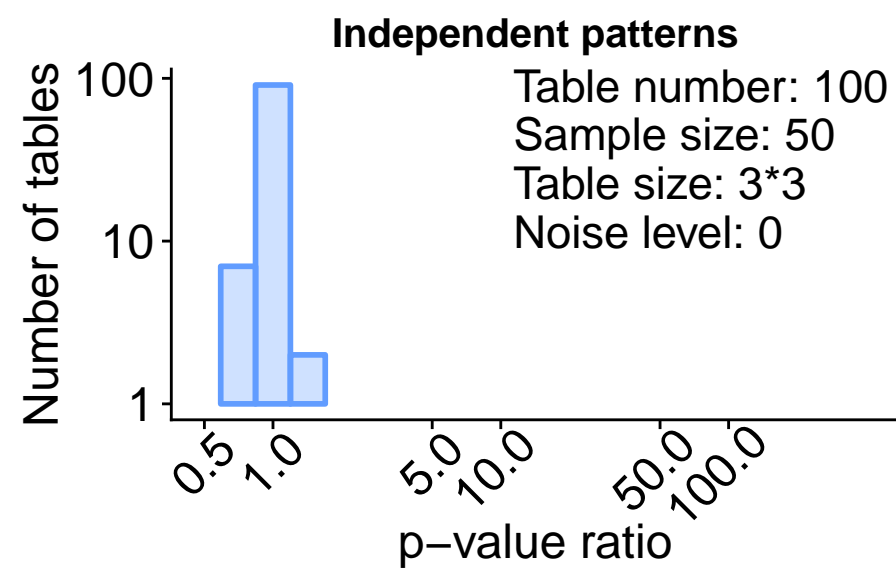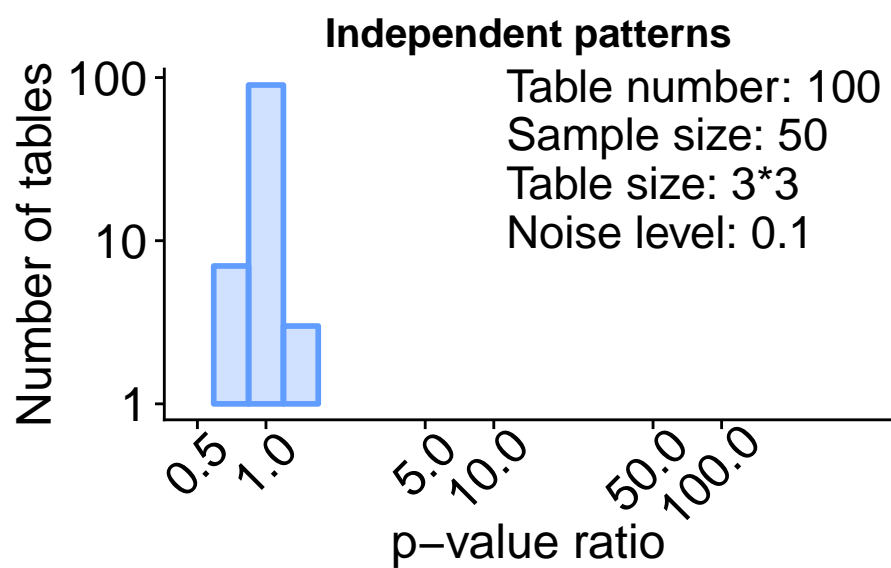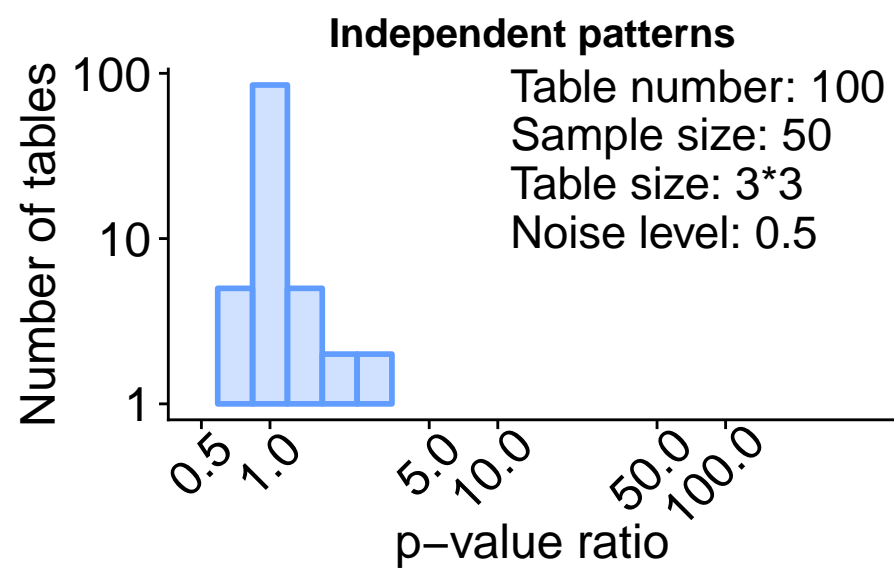

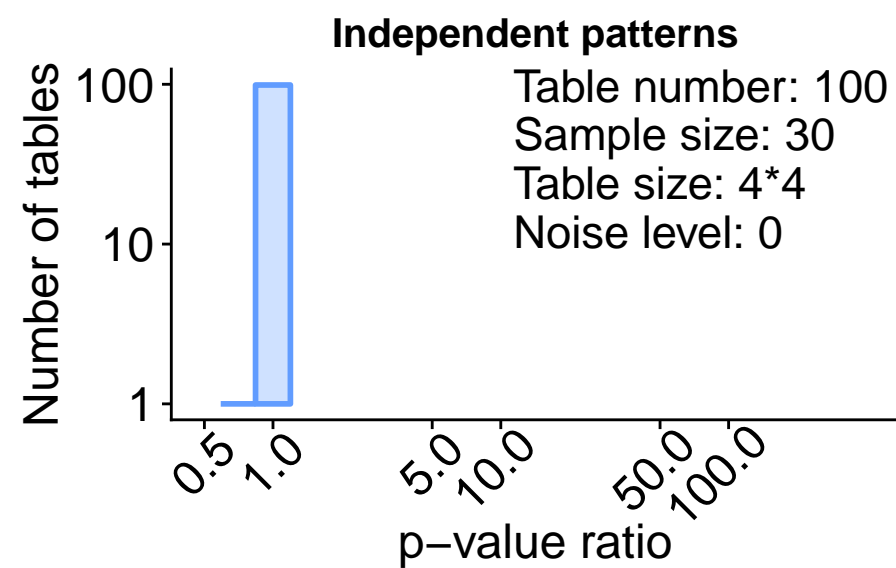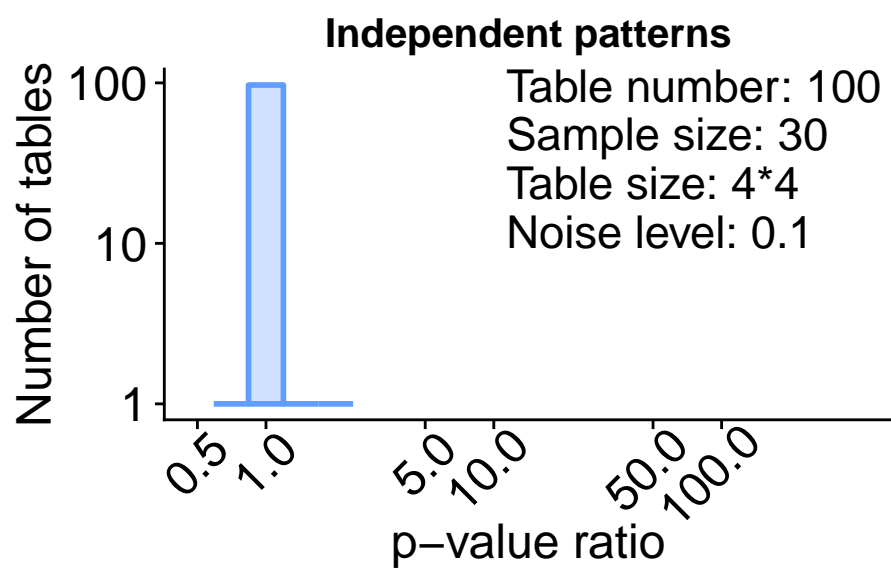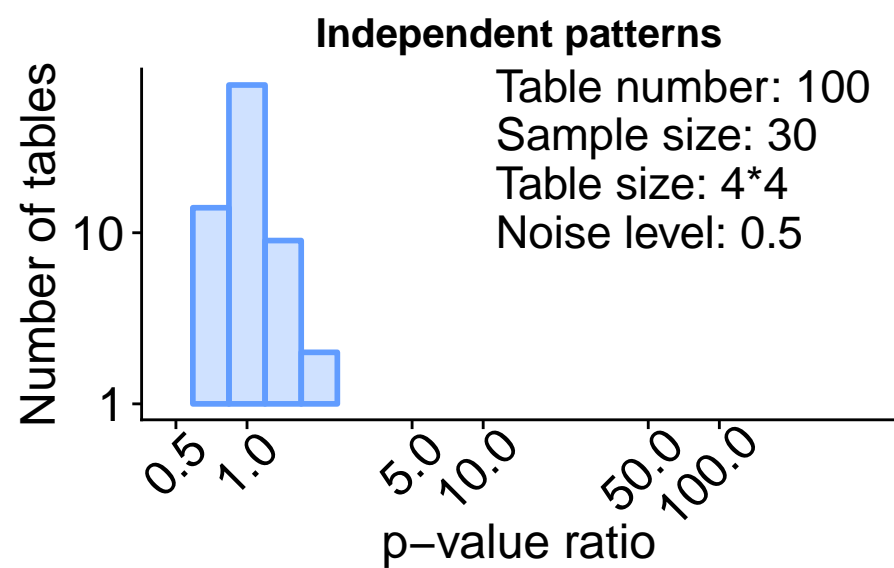

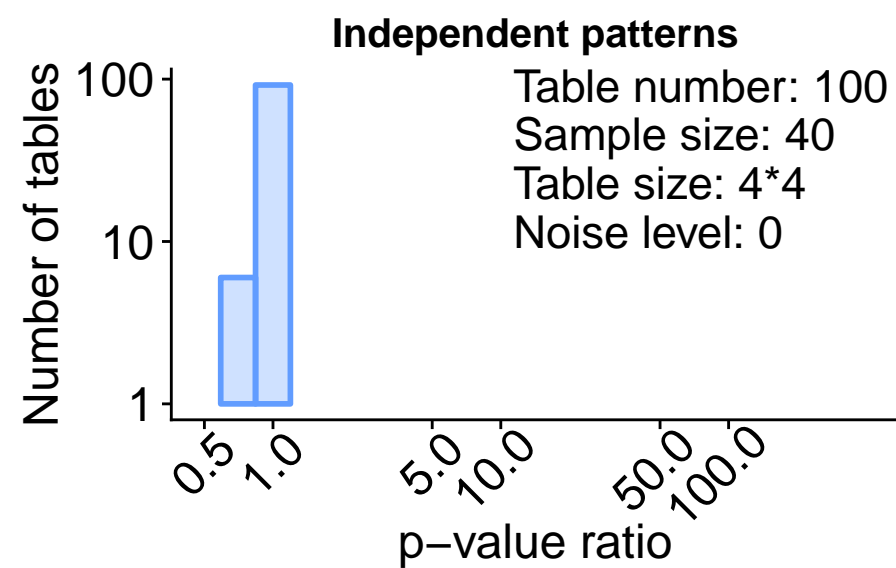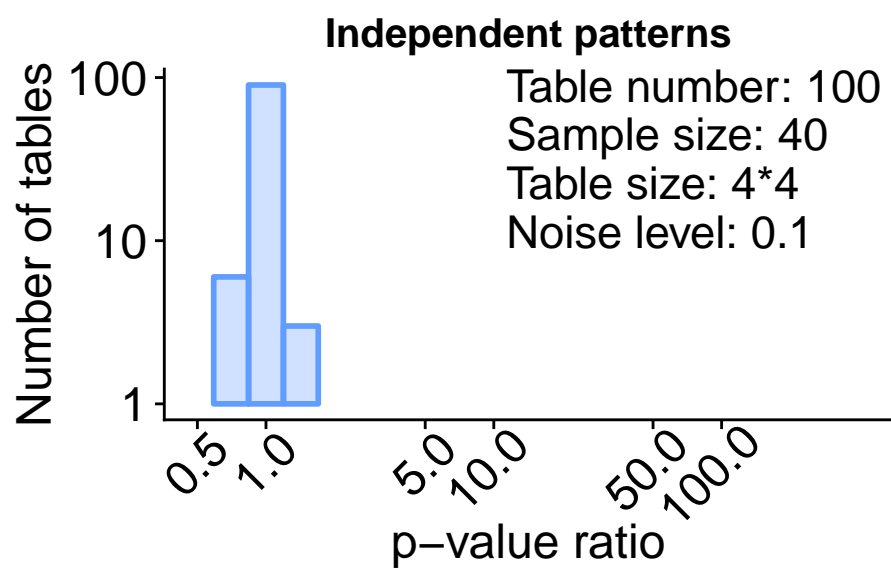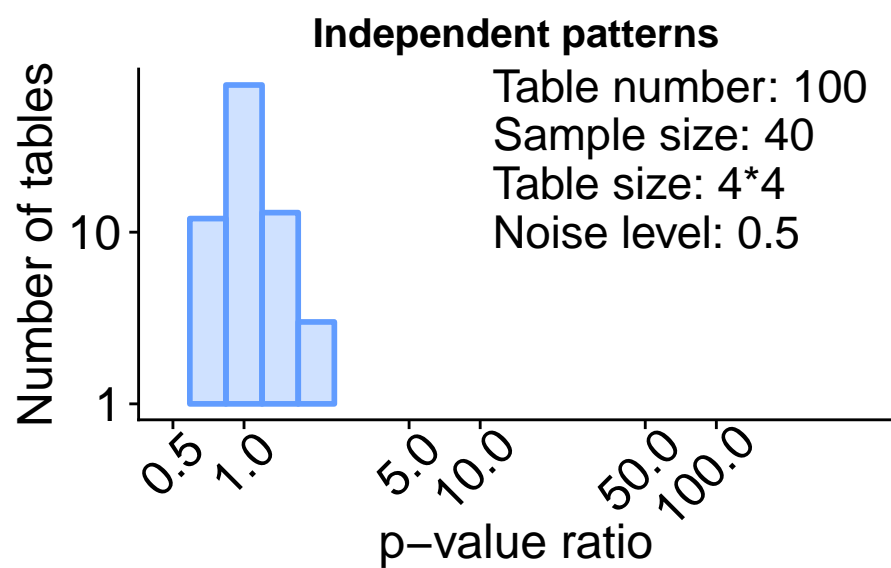



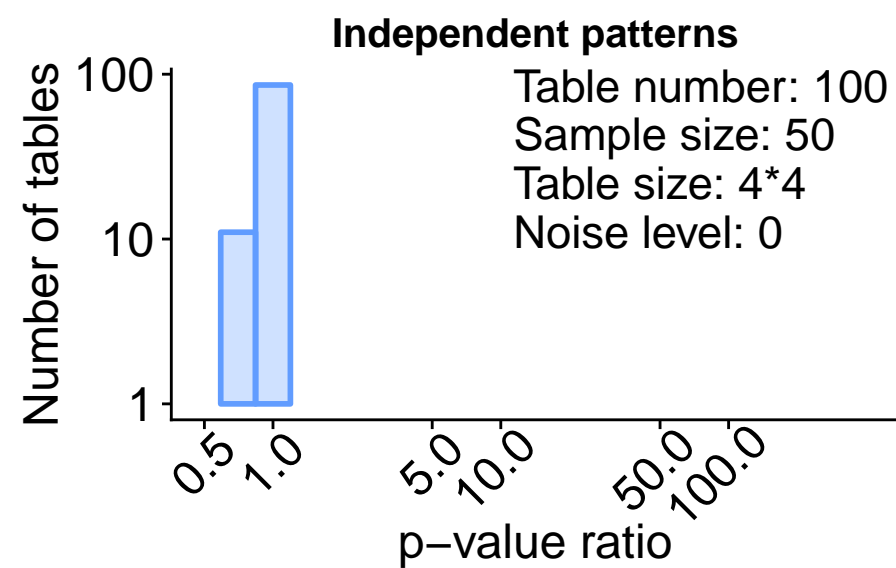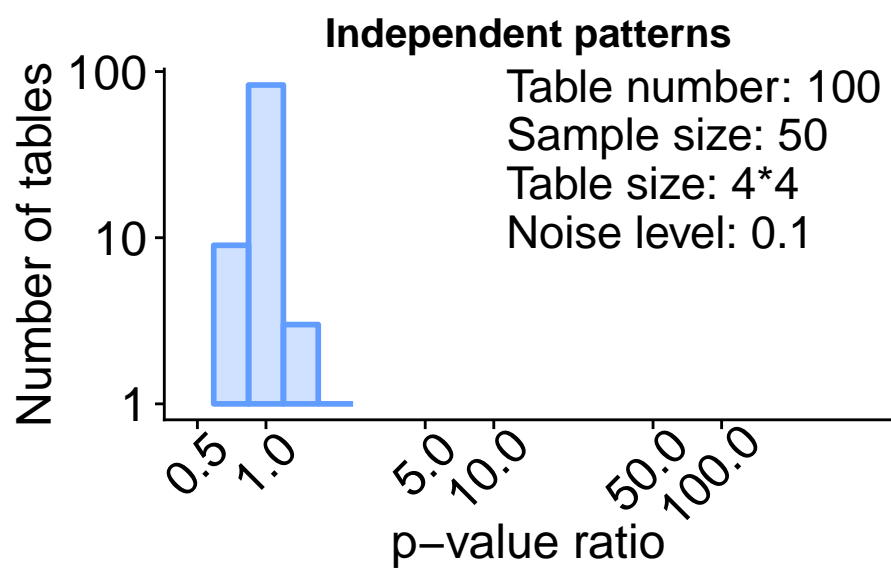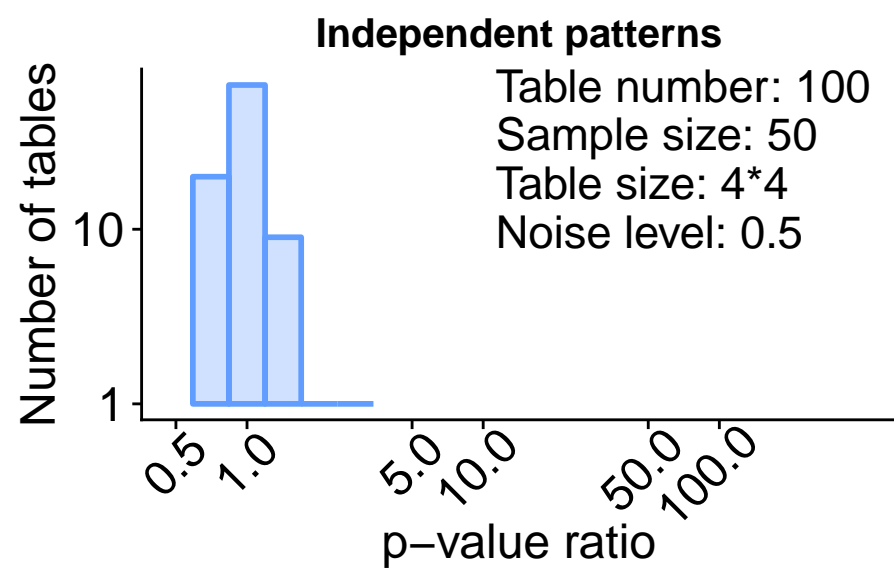

Supplement: NIHMS972140-supplement-Supplementary_File_4.pdf [file NIHMS972140-supplement-Supplementary_File_4.pdf]
